# Supplementary material for: Site specific ligand substitution in cubane-type Mo3FeS44+ clusters: Kinetics and mechanism of reaction and isolation of mixed ligand Cl/SPh complexes
Source: Royal Society of Chemistry journal article supplement (doi:10.1039/b924801c), 2010-01-01
Supplement: b924801c.pdf [file b924801c.pdf]

# Site Specific Ligand Substitution in Cubane-type $\text{Mo}_3\text{FeS}_4^{4+}$ Clusters Bearing diphosphane Ligands: Kinetics and Mechanism of Reaction and Isolation of Mixed Ligand Cl/SPh Complexes

Andrés G. Algarra,<sup>1</sup> Manuel G. Basallote<sup>1,\*</sup>, M. J. Fernandez-Trujillo<sup>1</sup>, Rosa Llusar<sup>2,\*</sup>, J. A. Pino<sup>1</sup>, Ivan Sorribes<sup>2</sup>, Cristian Vicent<sup>3,\*</sup>

<sup>1</sup>Departamento de Ciência de los Materiales e Ingeniería Metalúrgica y Química Inorgánica,  
Universidad de Cadiz, 11510 Puerto Real, Cadiz, Spain

<sup>2</sup>Departament de Química Física i Analítica, Universitat Jaume I, Av. Sos Baynat s/n, 12071  
Castelló, Spain

<sup>3</sup>Serveis Centrals d'Instrumentació Científica, Universitat Jaume I, Av. Sos Baynat s/n, 12071  
Castelló, Spain

## Contents

**Figure S1.**  $^1\text{H}$  NMR spectra of the open-shell 14 metal electrons cluster **1** (top) together with the diamagnetic starting  $[\text{Mo}_3\text{S}_4(\text{dmpe})_3\text{Cl}_3]^+$  complex (bottom). \*impurity.

**Figure S2.** ESI mass spectrum of  $\text{CH}_3\text{CN}$  solutions of **1** after prolonged reaction with an excess of  $\text{NaSPh}$ . Note that identical ionization mechanisms to that observed for **1**, that is, losses of anionic  $\text{SPh}^-$  and  $\text{FeSPh}^-$  fragments are also observed.

**Figure S3.** Optimized geometries for the  $[\text{Mo}_3(\text{FeX})\text{S}_4(\text{dmpe})_3\text{Cl}_3]$  cluster with different X ligands coordinated at the Fe site:  $\text{Cl}^-$  (**1**),  $\text{CH}_3\text{CN}$  and  $\text{PhS}^-$  (**2**). Although the complete dmpe ( $\text{Me}_2\text{PCH}_2\text{CH}_2\text{PMe}_2$ ) ligand was used in the calculations, for simplicity only the P atoms of the three dmpe ligands are shown in the Figure.

**Table S1.** Summary of kinetic data at  $25.0^\circ\text{C}$  for the reaction of cluster **1** with  $(\text{Et}_4\text{N})(\text{PhS})$ ,  $(\text{Hlut})\text{BPh}_4$ ,  $\text{HCl}$  and  $\text{HBF}_4$ .

**DFT Calculations: Cartesian coordinates and solution energies (acetonitrile, CPCM method) of the species discussed in the text.**

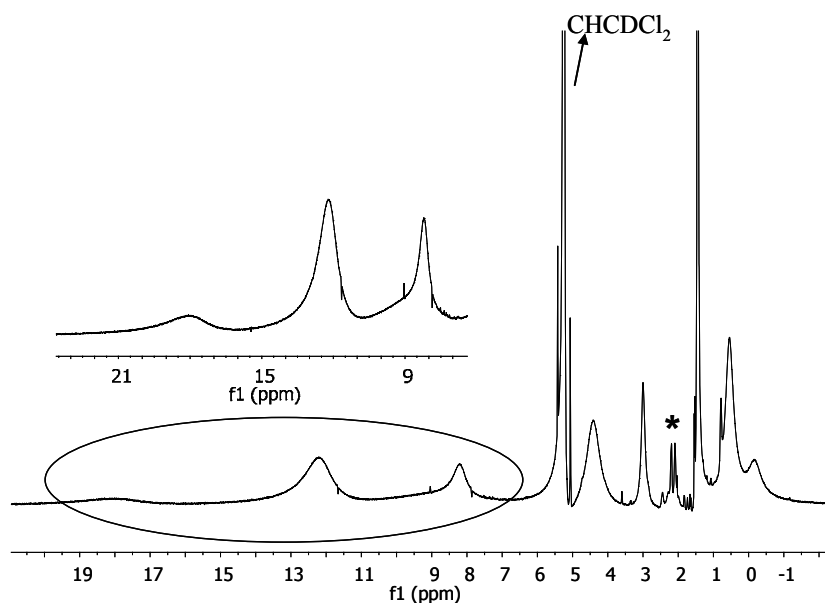

**Figure S1.** <sup>1</sup>H NMR spectra of the open-shell 14 metal electrons cluster **1** (top) together with the diamagnetic starting [Mo<sub>3</sub>S<sub>4</sub>(dmpe)<sub>3</sub>Cl<sub>3</sub>]<sup>+</sup> complex (bottom). \* impurity

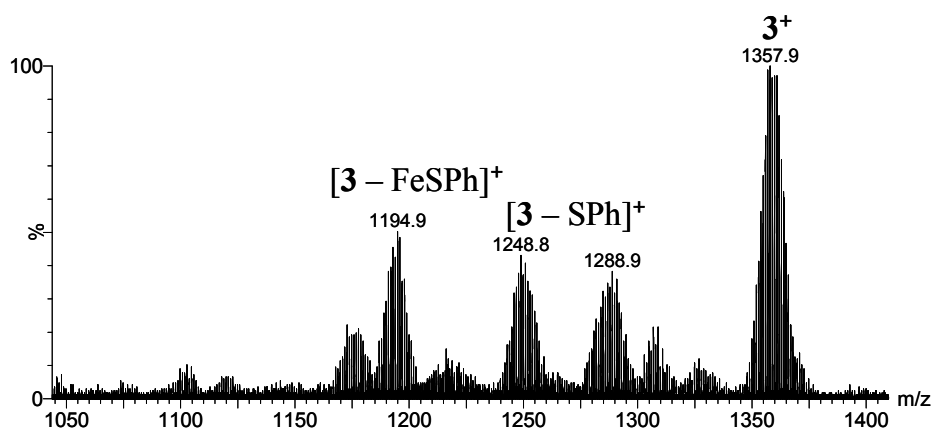

**Figure S2.** ESI mass spectrum of CH<sub>3</sub>CN solutions of **1** after prolonged reaction with an excess of NaSPh. Note that identical ionization mechanisms to that observed for **1**, that is, losses of anionic SPh<sup>-</sup> and FeSPh<sup>-</sup> fragments are also observed.

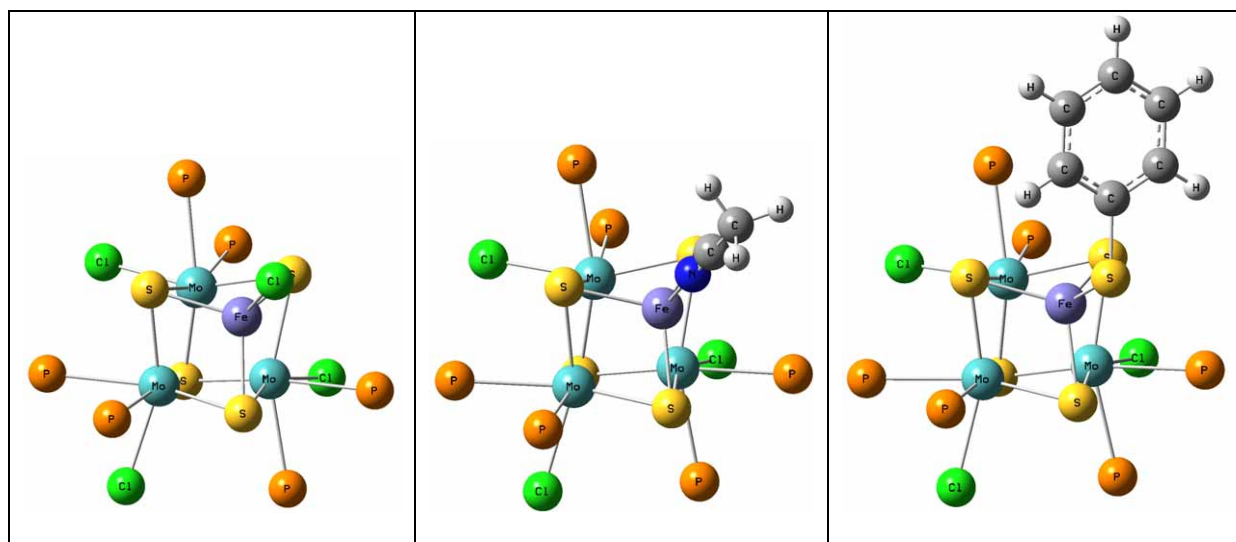

**Figure S3.** Optimized geometries for the  $[\text{Mo}_3(\text{FeX})\text{S}_4(\text{dmpe})_3\text{Cl}_3]$  cluster with different X ligands coordinated at the Fe site:  $\text{Cl}^-$  (**1**),  $\text{CH}_3\text{CN}$  and  $\text{PhS}^-$  (**2**). Although the complete dmpe ( $\text{Me}_2\text{PCH}_2\text{CH}_2\text{PMe}_2$ ) ligand was used in the calculations, for simplicity only the P atoms of the three dmpe ligands are shown in the Figure.

**Table S1.** Summary of kinetic data at 25.0 °C for the reaction of cluster **1** with (Et<sub>4</sub>N)(PhS), (Hlut)(BPh<sub>4</sub>), HCl and HBF<sub>4</sub>.

|                               |                           |                                               |                                               |                                               |
|-------------------------------|---------------------------|-----------------------------------------------|-----------------------------------------------|-----------------------------------------------|
| <b>(Et<sub>4</sub>N)(PhS)</b> |                           |                                               |                                               |                                               |
|                               | <b>[PhS<sup>-</sup>]</b>  | <b><i>k</i><sub>1obs</sub>/s<sup>-1</sup></b> | <b><i>k</i><sub>2obs</sub>/s<sup>-1</sup></b> | <b><i>k</i><sub>3obs</sub>/s<sup>-1</sup></b> |
|                               | 0.05                      | 0.061                                         | 3.7·10 <sup>-3</sup>                          | 6.2·10 <sup>-4</sup>                          |
|                               | 0.04                      | 0.043                                         | 3.0·10 <sup>-3</sup>                          | 8.6·10 <sup>-4</sup>                          |
|                               | 0.03                      | 0.052                                         | 3.1·10 <sup>-3</sup>                          | 8.5·10 <sup>-4</sup>                          |
|                               | 0.02                      | 0.060                                         | 4.2·10 <sup>-3</sup>                          | 10.0·10 <sup>-4</sup>                         |
|                               | 0.01                      | 0.082                                         | 3.7·10 <sup>-3</sup>                          | 9.7·10 <sup>-4</sup>                          |
|                               |                           |                                               |                                               |                                               |
| <b>(Hlut)BPh<sub>4</sub></b>  |                           |                                               |                                               |                                               |
|                               | <b>[Hlut<sup>+</sup>]</b> | <b><i>k</i><sub>1obs</sub>/s<sup>-1</sup></b> |                                               |                                               |
|                               | 0.05                      | 3.6·10 <sup>-3</sup>                          |                                               |                                               |
|                               | 0.04                      | 1.9·10 <sup>-3</sup>                          |                                               |                                               |
|                               | 0.03                      | 2.3·10 <sup>-3</sup>                          |                                               |                                               |
|                               | 0.02                      | 1.5·10 <sup>-3</sup>                          |                                               |                                               |
|                               | 0.01                      | 3.3·10 <sup>-3</sup>                          |                                               |                                               |
|                               |                           |                                               |                                               |                                               |
| <b>HCl</b>                    |                           |                                               |                                               |                                               |
|                               | <b>[HCl]</b>              | <b><i>k</i><sub>1obs</sub>/s<sup>-1</sup></b> |                                               |                                               |
|                               | 0.04                      | 3.9·10 <sup>-4</sup>                          |                                               |                                               |
|                               | 0.02                      | 5.8·10 <sup>-4</sup>                          |                                               |                                               |
|                               | 0.01                      | 4.0·10 <sup>-4</sup>                          |                                               |                                               |
|                               |                           |                                               |                                               |                                               |
| <b>HBF<sub>4</sub></b>        |                           |                                               |                                               |                                               |
|                               | <b>[HBF<sub>4</sub>]</b>  | <b><i>k</i><sub>1obs</sub>/s<sup>-1</sup></b> |                                               |                                               |
|                               | 0.04                      | 4.6·10 <sup>-4</sup>                          |                                               |                                               |
|                               | 0.02                      | 5.3·10 <sup>-4</sup>                          |                                               |                                               |

|  |      |                     |  |  |
|--|------|---------------------|--|--|
|  | 0.01 | $5.0 \cdot 10^{-4}$ |  |  |
|--|------|---------------------|--|--|

**DFT Calculations: Cartesian coordinates and solution energies (acetonitrile, CPCM method) of the species discussed in the text.**

Cl<sup>-</sup>  
 E(CH<sub>3</sub>CN)= -15.1245437 a. u.

Cl...H...Cl<sup>-</sup>  
 E(CH<sub>3</sub>CN)= -30.6939541 a. u.

|    |           |           |          |
|----|-----------|-----------|----------|
| Cl | -0.000025 | 1.616262  | 0.000000 |
| H  | 0.000856  | -0.000442 | 0.000000 |
| Cl | -0.000025 | -1.616236 | 0.000000 |

CH<sub>3</sub>CN  
 E(CH<sub>3</sub>CN)= -132.7371901 a. u.

|   |           |           |           |
|---|-----------|-----------|-----------|
| C | 1.191565  | 0.000429  | -0.000198 |
| H | 1.573895  | -0.405375 | 0.942984  |
| H | 1.569432  | 1.021844  | -0.120319 |
| H | 1.572242  | -0.612688 | -0.824604 |
| C | -0.277128 | -0.002080 | 0.001005  |
| N | -1.457456 | 0.000875  | -0.000415 |

Hsph  
 E(CH<sub>3</sub>CN)= -242.3143622 a. u.

|   |           |           |           |
|---|-----------|-----------|-----------|
| S | 2.338746  | -0.085005 | -0.000425 |
| H | 2.574220  | 1.270773  | 0.001601  |
| C | 0.494296  | 0.001202  | 0.000768  |
| C | -0.211205 | -1.219634 | 0.000518  |
| C | -0.208427 | 1.222061  | 0.000199  |
| C | -1.618096 | -1.213537 | -0.000228 |
| H | 0.327538  | -2.163939 | 0.000935  |
| C | -1.616697 | 1.218503  | -0.000053 |
| H | 0.326035  | 2.169524  | -0.000055 |
| C | -2.327518 | 0.003598  | -0.000239 |
| H | -2.155286 | -2.158913 | -0.000510 |
| H | -2.152126 | 2.164957  | -0.000237 |
| H | -3.414435 | 0.004509  | -0.000719 |

sph<sup>-</sup>  
 E(CH<sub>3</sub>CN)= -241.8580585 a. u.

|   |           |           |           |
|---|-----------|-----------|-----------|
| S | -2.390399 | -0.000039 | -0.000497 |
| C | -0.592302 | 0.000172  | 0.000204  |
| C | 0.174556  | -1.212444 | -0.000025 |
| C | 0.174185  | 1.212309  | 0.000135  |
| C | 1.580328  | -1.212066 | 0.000139  |
| H | -0.370359 | -2.155137 | -0.000259 |
| C | 1.580458  | 1.211891  | 0.000311  |

|   |           |           |          |
|---|-----------|-----------|----------|
| H | -0.369658 | 2.155588  | 0.000026 |
| C | 2.309203  | 0.000150  | 0.000422 |
| H | 2.114640  | -2.164580 | 0.000095 |
| H | 2.114216  | 2.164731  | 0.000407 |
| H | 3.398981  | -0.000044 | 0.000573 |

**1** (mofecl)

E(CH<sub>3</sub>CN)= a. u.

|    |             |             |             |
|----|-------------|-------------|-------------|
| C  | 3.61773400  | -3.80916100 | -0.75061600 |
| C  | 4.48981300  | -2.83573500 | 0.05759000  |
| P  | 3.45681300  | -1.72191500 | 1.19959800  |
| Mo | 1.39570500  | -0.81875200 | -0.15481100 |
| P  | 1.98982100  | -3.07181600 | -1.46736200 |
| Mo | -1.39083500 | -0.83242600 | -0.21946500 |
| P  | -3.27806800 | -2.09413600 | 1.09206100  |
| C  | -4.76340600 | -2.31162900 | -0.07387300 |
| C  | -5.09336700 | -1.02173600 | -0.84274500 |
| P  | -3.58078500 | -0.07105700 | -1.56020800 |
| S  | -1.98017100 | 1.12852400  | 1.20169500  |
| Fe | -0.17965900 | -0.07049800 | 1.96258900  |
| Cl | -0.31828000 | -0.09779200 | 4.21974600  |
| Mo | -0.04094400 | 1.61894000  | -0.21090400 |
| P  | -0.29395700 | 3.89984000  | 1.06570200  |
| C  | 0.28357800  | 5.31521400  | -0.06389700 |
| C  | 1.58579200  | 5.00835000  | -0.82670700 |
| P  | 1.90089800  | 3.15751900  | -1.27543600 |
| S  | 0.05074600  | -0.02435700 | -2.04546600 |
| S  | 0.10290600  | -2.24900300 | 1.28221700  |
| S  | 1.70020200  | 1.08412400  | 1.41417400  |
| C  | 3.15972200  | -2.75308300 | 2.74904000  |
| C  | 4.74566900  | -0.48626000 | 1.79493900  |
| C  | 0.94709800  | -4.64015000 | -1.36114800 |
| C  | 2.28658900  | -2.93120600 | -3.32053600 |
| C  | 3.70653200  | 3.08651100  | -0.71904800 |
| C  | 2.04390200  | 3.14034700  | -3.15092600 |
| C  | -2.03169600 | 4.47666400  | 1.49992600  |
| C  | 0.62986400  | 4.14558000  | 2.68982300  |
| C  | -3.62312100 | -0.43013100 | -3.40846200 |
| C  | -4.32704600 | 1.66178600  | -1.49246600 |
| C  | -4.01237100 | -1.32757600 | 2.65116200  |
| C  | -2.94351700 | -3.86472300 | 1.63191100  |
| H  | 3.29999600  | -4.64745100 | -0.11766000 |
| H  | 4.18911200  | -4.23164800 | -1.58694100 |
| H  | 5.02772200  | -2.15396900 | -0.60706600 |
| H  | 5.22208100  | -3.38620800 | 0.66373400  |
| H  | 2.45268200  | 5.31130400  | -0.22722000 |
| H  | -0.54181600 | 5.46726500  | -0.76400600 |
| H  | 1.61694600  | 5.58296400  | -1.76007600 |
| H  | 0.39755000  | 6.22499500  | 0.54100200  |
| H  | -4.48231400 | -3.11409100 | -0.76184600 |
| H  | -5.63151900 | -2.64129700 | 0.51319700  |
| H  | -5.59939800 | -0.30621800 | -0.18162400 |
| H  | -5.77770700 | -1.23557100 | -1.67406900 |
| H  | 2.73827900  | 3.91799500  | -3.49135700 |
| H  | 2.41472200  | 2.15621600  | -3.45015100 |
| H  | 1.05199700  | 3.29982400  | -3.58001600 |
| H  | 4.25701900  | 3.91107500  | -1.18916000 |
| H  | 3.75299700  | 3.19094500  | 0.36967700  |
| H  | 4.14365100  | 2.13087800  | -1.00654400 |
| H  | 0.37707000  | 5.11667200  | 3.13142300  |
| H  | 0.34958700  | 3.34090100  | 3.37677800  |

|    |             |             |             |
|----|-------------|-------------|-------------|
| H  | 1.70901700  | 4.08689900  | 2.52073800  |
| H  | -2.01115300 | 5.52968500  | 1.80618500  |
| H  | -2.66767500 | 4.35674200  | 0.61913600  |
| H  | -2.42802600 | 3.86499700  | 2.31454500  |
| H  | -4.61179200 | -0.19703300 | -3.82202200 |
| H  | -2.86553900 | 0.19200400  | -3.89489900 |
| H  | -3.37514500 | -1.48057200 | -3.57235800 |
| H  | -5.35544700 | 1.62312300  | -1.87304900 |
| H  | -4.32979200 | 2.01659600  | -0.45759600 |
| H  | -3.72742600 | 2.34894300  | -2.08990500 |
| H  | -3.87965500 | -4.35095100 | 1.93224300  |
| H  | -2.49345600 | -4.40129300 | 0.79340400  |
| H  | -2.24558100 | -3.86161500 | 2.47374000  |
| H  | -4.76217300 | -1.99706700 | 3.08928600  |
| H  | -3.20929900 | -1.14867600 | 3.37322800  |
| H  | -4.47111400 | -0.36338800 | 2.41300500  |
| H  | 4.11353600  | -3.01862800 | 3.21997100  |
| H  | 2.54988700  | -2.17123900 | 3.44726300  |
| H  | 2.60528000  | -3.66102700 | 2.49572800  |
| H  | 5.63259400  | -1.01807200 | 2.16032500  |
| H  | 5.02041300  | 0.16651200  | 0.96308900  |
| H  | 4.32339600  | 0.11802800  | 2.60236100  |
| H  | 2.62908200  | -3.89122600 | -3.72497300 |
| H  | 1.34165300  | -2.64945400 | -3.79486600 |
| H  | 3.02408100  | -2.14876600 | -3.50880000 |
| H  | 1.53248300  | -5.48075800 | -1.75471300 |
| H  | 0.68097800  | -4.82710200 | -0.31683800 |
| H  | 0.02597800  | -4.51453300 | -1.92969500 |
| Cl | -1.28520300 | 3.07757800  | -1.91643500 |
| Cl | -1.86990400 | -2.89362600 | -1.72161200 |
| Cl | 3.41821800  | -0.13988000 | -1.63896300 |

mofe-vac

$E(\text{CH}_3\text{CN}) = -1165.4450869$  a. u.

|    |           |           |           |
|----|-----------|-----------|-----------|
| C  | -4.337753 | -2.993309 | 0.673431  |
| C  | -5.006897 | -1.861225 | -0.119490 |
| P  | -3.795148 | -1.011754 | -1.307527 |
| Mo | -1.548652 | -0.545615 | -0.001701 |
| P  | -2.592641 | -2.595006 | 1.365480  |
| Mo | 1.243053  | -1.101672 | 0.021807  |
| P  | 2.858371  | -2.739670 | -1.243073 |
| C  | 4.223462  | -3.250717 | -0.025805 |
| C  | 4.809053  | -2.041811 | 0.719651  |
| P  | 3.525308  | -0.772031 | 1.375947  |
| S  | 2.185318  | 0.756103  | -1.414143 |
| Fe | 0.190752  | -0.150700 | -2.001498 |
| Mo | 0.393258  | 1.591623  | 0.062847  |
| P  | 1.049215  | 3.798297  | -1.212230 |
| C  | 0.080216  | 5.292628  | -0.530391 |
| C  | -0.307171 | 5.102236  | 0.948291  |
| P  | -1.186920 | 3.433818  | 1.210379  |
| S  | -0.040615 | -0.033211 | 1.851337  |
| S  | -0.588287 | -2.213562 | -1.439655 |
| S  | -1.450189 | 1.409861  | -1.534039 |
| C  | -3.769306 | -2.130722 | -2.824651 |
| C  | -4.792363 | 0.465955  | -1.906108 |
| C  | -1.875729 | -4.336887 | 1.312489  |
| C  | -2.835655 | -2.314602 | 3.208827  |
| C  | -2.888373 | 3.854177  | 0.513318  |
| C  | -1.444230 | 3.331240  | 3.066667  |
| C  | 2.847909  | 4.334418  | -1.086690 |



|    |           |           |           |
|----|-----------|-----------|-----------|
| C  | 0.729044  | 3.875374  | -3.066048 |
| C  | 3.427982  | -1.069869 | 3.230386  |
| C  | 4.606469  | 0.768890  | 1.266849  |
| C  | 3.801386  | -2.150648 | -2.766447 |
| C  | 2.160884  | -4.396287 | -1.794611 |
| H  | -4.207647 | -3.878636 | 0.038582  |
| H  | -4.968829 | -3.291981 | 1.519562  |
| H  | -5.376660 | -1.078173 | 0.547688  |
| H  | -5.853393 | -2.249688 | -0.700450 |
| H  | -0.987601 | 5.901265  | 1.268733  |
| H  | 0.696193  | 6.191159  | -0.656581 |
| H  | 0.573492  | 5.119422  | 1.595380  |
| H  | -0.811483 | 5.417477  | -1.157136 |
| H  | 3.758422  | -3.953927 | 0.669725  |
| H  | 5.010534  | -3.778286 | -0.580121 |
| H  | 5.472732  | -1.471487 | 0.057418  |
| H  | 5.411866  | -2.376138 | 1.572936  |
| H  | -1.897976 | 4.258193  | 3.436102  |
| H  | -2.102243 | 2.486256  | 3.281896  |
| H  | -0.476113 | 3.173319  | 3.547845  |
| H  | -3.278672 | 4.735014  | 1.036441  |
| H  | -2.812571 | 4.069033  | -0.556566 |
| H  | -3.561900 | 3.010326  | 0.660054  |
| H  | 0.978872  | 4.869259  | -3.454402 |
| H  | 1.350726  | 3.128790  | -3.569381 |
| H  | -0.321779 | 3.655449  | -3.272863 |
| H  | 2.986866  | 5.286385  | -1.611512 |
| H  | 3.121267  | 4.439711  | -0.035077 |
| H  | 3.484304  | 3.570467  | -1.541385 |
| H  | 4.431984  | -1.045541 | 3.669185  |
| H  | 2.816422  | -0.280099 | 3.676509  |
| H  | 2.953647  | -2.035073 | 3.417308  |
| H  | 5.595665  | 0.532760  | 1.677014  |
| H  | 4.708397  | 1.076497  | 0.222327  |
| H  | 4.155870  | 1.585203  | 1.830156  |
| H  | 2.975712  | -5.061448 | -2.102745 |
| H  | 1.617286  | -4.839322 | -0.956834 |
| H  | 1.472282  | -4.252416 | -2.631852 |
| H  | 4.489339  | -2.931090 | -3.110679 |
| H  | 3.092692  | -1.920159 | -3.568385 |
| H  | 4.362681  | -1.241334 | -2.534853 |
| H  | -4.785425 | -2.259196 | -3.214474 |
| H  | -3.140906 | -1.680139 | -3.598836 |
| H  | -3.346789 | -3.105924 | -2.568235 |
| H  | -5.779741 | 0.132665  | -2.245803 |
| H  | -4.906815 | 1.173457  | -1.081865 |
| H  | -4.271579 | 0.957151  | -2.732364 |
| H  | -3.351911 | -3.174367 | 3.650787  |
| H  | -1.853498 | -2.200351 | 3.676871  |
| H  | -3.412996 | -1.402301 | 3.367720  |
| H  | -2.625184 | -5.031765 | 1.710234  |
| H  | -1.632345 | -4.607743 | 0.281444  |
| H  | -0.963532 | -4.388667 | 1.905661  |
| Cl | 1.871140  | 2.685526  | 1.792762  |
| Cl | 1.247970  | -3.174643 | 1.507810  |
| Cl | -3.329512 | 0.591302  | 1.437731  |

mofe-ch3cn

E(CH<sub>3</sub>CN)= -1298.2226222 a. u.

C 2.16264400 -4.56064700 -1.54591100

|    |             |             |             |
|----|-------------|-------------|-------------|
| C  | 2.53539700  | -4.66589100 | -0.05246500 |
| P  | 2.60141700  | -2.95199800 | 0.79095700  |
| Mo | 0.99539200  | -1.26809300 | -0.41633000 |
| P  | 0.59245400  | -3.50524700 | -1.77303100 |
| Mo | -1.59897700 | -0.23519900 | -0.23913200 |
| P  | -3.89031300 | -0.63720000 | 1.03811800  |
| C  | -5.27107800 | -0.66185200 | -0.27253800 |
| C  | -5.16367700 | 0.48301400  | -1.30445300 |
| P  | -3.39343700 | 1.20024500  | -1.55638900 |
| S  | -1.26407900 | 1.70774000  | 1.25403700  |
| Fe | -0.00647800 | -0.05233800 | 2.07022500  |
| Cl | -1.70071100 | -0.44950000 | 3.75636200  |
| Mo | 0.54449200  | 1.54028800  | -0.37788400 |
| P  | 1.30201400  | 3.69720600  | 0.87643900  |
| C  | 2.83045400  | 4.47986100  | 0.03165700  |
| C  | 2.89368200  | 4.16568900  | -1.47779500 |
| P  | 2.69018900  | 2.29582700  | -1.80067300 |
| S  | -0.12901100 | 0.00992500  | -2.17326600 |
| S  | -0.64345100 | -2.06836400 | 1.14204700  |
| S  | 2.13141300  | 0.36574100  | 0.98500300  |
| C  | 2.31407700  | -3.37347600 | 2.60560400  |
| C  | 4.44019300  | -2.53929100 | 0.78081100  |
| C  | -0.72177800 | -4.74384600 | -1.22959700 |
| C  | 0.36519900  | -3.41025800 | -3.63426300 |
| C  | 4.42427900  | 1.69844400  | -1.35095200 |
| C  | 2.65216300  | 2.16372600  | -3.67421300 |
| C  | 0.07102200  | 5.11826000  | 0.97067500  |
| C  | 1.85365400  | 3.54525300  | 2.67134500  |
| C  | -3.22455900 | 1.26063500  | -3.42935400 |
| C  | -3.70997200 | 3.01050700  | -1.11569200 |
| C  | -4.56668100 | 0.64447100  | 2.24681400  |
| C  | -4.16926300 | -2.27696300 | 1.91369500  |
| H  | 1.98119600  | -5.55833700 | -1.96693900 |
| H  | 2.96119900  | -4.07772000 | -2.11569500 |
| H  | 3.50995300  | -5.15480600 | 0.07266600  |
| H  | 1.79333900  | -5.26401100 | 0.49172500  |
| H  | 3.85620100  | 4.49122900  | -1.89486600 |
| H  | 2.80525800  | 5.56398500  | 0.20133000  |
| H  | 2.08971000  | 4.67394400  | -2.01733000 |
| H  | 3.71704300  | 4.08783900  | 0.54727500  |
| H  | -5.18569000 | -1.62738900 | -0.77474100 |
| H  | -6.23661200 | -0.62012500 | 0.24931600  |
| H  | -5.79765800 | 1.32909800  | -1.01217000 |
| H  | -5.50757800 | 0.13273800  | -2.28389100 |
| H  | 3.48501900  | 2.72139600  | -4.11962800 |
| H  | 2.72744800  | 1.10613700  | -3.94096700 |
| H  | 1.69884600  | 2.56178600  | -4.03079600 |
| H  | 5.16435200  | 2.20413100  | -1.98350800 |
| H  | 4.62887900  | 1.91922900  | -0.29867400 |
| H  | 4.47462700  | 0.61903800  | -1.50401500 |
| H  | 2.20590200  | 4.51138600  | 3.05201100  |
| H  | 1.00465500  | 3.20021200  | 3.26858500  |
| H  | 2.65178600  | 2.80107700  | 2.74279200  |
| H  | 0.51565000  | 5.97213100  | 1.49585800  |
| H  | -0.22188200 | 5.40148600  | -0.04232700 |
| H  | -0.81782700 | 4.77380900  | 1.50725300  |
| H  | -4.09888300 | 1.75027100  | -3.87550600 |
| H  | -2.31909000 | 1.81961000  | -3.67915100 |
| H  | -3.13487400 | 0.23655900  | -3.80070700 |
| H  | -4.53408300 | 3.39770400  | -1.72805000 |
| H  | -3.97452900 | 3.08874100  | -0.05670600 |

|    |             |             |             |
|----|-------------|-------------|-------------|
| H  | -2.80449100 | 3.59053200  | -1.30220600 |
| H  | -5.21866700 | -2.36929500 | 2.22019700  |
| H  | -3.90984100 | -3.08651500 | 1.22571600  |
| H  | -3.51548400 | -2.31251400 | 2.78797000  |
| H  | -5.56487000 | 0.34118400  | 2.58663500  |
| H  | -3.88136300 | 0.71514200  | 3.09327000  |
| H  | -4.62883800 | 1.61924700  | 1.75246700  |
| H  | 3.00299200  | -4.16301400 | 2.92913100  |
| H  | 2.47423700  | -2.47457400 | 3.20753700  |
| H  | 1.27926900  | -3.69569100 | 2.74859900  |
| H  | 5.01212100  | -3.34481100 | 1.25717700  |
| H  | 4.76501300  | -2.39798400 | -0.25205700 |
| H  | 4.59621400  | -1.60361100 | 1.32622400  |
| H  | 0.41128800  | -4.41148300 | -4.07927800 |
| H  | -0.61123900 | -2.96001900 | -3.83282900 |
| H  | 1.15120400  | -2.77538100 | -4.05037100 |
| H  | -0.60065500 | -5.67712900 | -1.79368100 |
| H  | -0.62409800 | -4.94059900 | -0.15806800 |
| H  | -1.70710600 | -4.31233400 | -1.41368300 |
| Cl | -0.34529800 | 3.37185900  | -1.97614800 |
| Cl | -2.74990700 | -2.03727600 | -1.76726200 |
| Cl | 2.97143700  | -1.33533800 | -2.14245000 |
| C  | 2.12583600  | 0.12294500  | 6.05106500  |
| H  | 3.16697000  | 0.46487200  | 6.03266700  |
| H  | 1.54228400  | 0.80701300  | 6.67864800  |
| H  | 2.09179200  | -0.87322800 | 6.50810600  |
| C  | 1.56209100  | 0.08174800  | 4.70062100  |
| N  | 1.04607000  | 0.04046100  | 3.64772400  |

mofecl-hcl1

E(CH<sub>3</sub>CN) = -1196.1778888 a. u.

|    |           |           |           |
|----|-----------|-----------|-----------|
| C  | 1.681103  | 4.769282  | -1.466524 |
| C  | 0.661972  | 5.218981  | -0.408922 |
| P  | 0.325147  | 3.861691  | 0.877780  |
| Mo | 0.000769  | 1.574999  | -0.392293 |
| P  | 1.424520  | 2.994713  | -2.155561 |
| Mo | 1.090962  | -0.985271 | -0.617593 |
| P  | 3.277849  | -2.162317 | 0.246937  |
| C  | 3.767660  | -3.486944 | -1.026225 |
| C  | 2.569272  | -4.334100 | -1.481585 |
| P  | 0.959102  | -3.353541 | -1.862467 |
| S  | -0.101201 | -2.240991 | 1.194090  |
| Fe | 0.450127  | -0.080442 | 1.721970  |
| Cl | 0.930979  | -0.007865 | 3.974072  |
| Mo | -1.611894 | -0.712090 | 0.003723  |
| P  | -3.229498 | -1.727935 | 1.804900  |
| C  | -5.020142 | -1.120889 | 1.531025  |
| C  | -5.295044 | -0.783190 | 0.051734  |
| P  | -3.967246 | 0.403964  | -0.630544 |
| S  | -0.604028 | -0.038057 | -2.137626 |
| S  | 2.122286  | 1.013765  | 0.586549  |
| S  | -1.462064 | 1.156164  | 1.568410  |
| C  | 1.718497  | 4.031033  | 2.136096  |
| C  | -1.141761 | 4.575852  | 1.815145  |
| C  | 3.224066  | 2.629541  | -2.580718 |
| C  | 0.670584  | 3.235154  | -3.863942 |
| C  | -4.567671 | 2.017859  | 0.145503  |
| C  | -4.414021 | 0.591950  | -2.445090 |
| C  | -3.397194 | -3.602507 | 1.823167  |
| C  | -2.906053 | -1.332562 | 3.616939  |
| C  | 0.847770  | -3.322027 | -3.741753 |

|    |           |           |           |
|----|-----------|-----------|-----------|
| C  | -0.266199 | -4.721185 | -1.426122 |
| C  | 3.262982  | -3.083728 | 1.892500  |
| C  | 4.848158  | -1.134405 | 0.365057  |
| H  | 2.693382  | 4.772225  | -1.042416 |
| H  | 1.683096  | 5.461796  | -2.318204 |
| H  | -0.305782 | 5.440799  | -0.868058 |
| H  | 1.017943  | 6.119144  | 0.109894  |
| H  | -6.276564 | -0.302665 | -0.055519 |
| H  | -5.709916 | -1.896192 | 1.887122  |
| H  | -5.277256 | -1.683929 | -0.567615 |
| H  | -5.163224 | -0.237300 | 2.166145  |
| H  | 4.201764  | -2.940593 | -1.868189 |
| H  | 4.545008  | -4.126185 | -0.586027 |
| H  | 2.293792  | -5.051964 | -0.698170 |
| H  | 2.827193  | -4.913419 | -2.377592 |
| H  | -5.482015 | 0.815818  | -2.554771 |
| H  | -3.818018 | 1.408612  | -2.860430 |
| H  | -4.169568 | -0.338622 | -2.962949 |
| H  | -5.620830 | 2.175037  | -0.118541 |
| H  | -4.464570 | 1.969036  | 1.233773  |
| H  | -3.960627 | 2.842023  | -0.230415 |
| H  | -3.634262 | -1.845792 | 4.255990  |
| H  | -1.892458 | -1.646578 | 3.881870  |
| H  | -2.969987 | -0.252514 | 3.774282  |
| H  | -4.145598 | -3.904939 | 2.565167  |
| H  | -3.684681 | -3.947537 | 0.827824  |
| H  | -2.427968 | -4.038799 | 2.081002  |
| H  | 0.937603  | -4.337018 | -4.147170 |
| H  | -0.122604 | -2.900120 | -4.020680 |
| H  | 1.638619  | -2.679348 | -4.133579 |
| H  | 0.065772  | -5.657590 | -1.891609 |
| H  | -0.304144 | -4.843343 | -0.339900 |
| H  | -1.262375 | -4.455132 | -1.778724 |
| H  | 5.716683  | -1.795490 | 0.473998  |
| H  | 4.941815  | -0.540586 | -0.547228 |
| H  | 4.788337  | -0.471420 | 1.232191  |
| H  | 4.242796  | -3.538041 | 2.080223  |
| H  | 3.033987  | -2.378564 | 2.696702  |
| H  | 2.488141  | -3.855663 | 1.884077  |
| H  | 1.725141  | 5.041237  | 2.562270  |
| H  | 1.565961  | 3.296606  | 2.932827  |
| H  | 2.682511  | 3.818344  | 1.666068  |
| H  | -0.934100 | 5.615248  | 2.096586  |
| H  | -2.024746 | 4.533058  | 1.173353  |
| H  | -1.320875 | 3.982706  | 2.715894  |
| H  | 1.303949  | 3.897669  | -4.465773 |
| H  | 0.600266  | 2.256380  | -4.348112 |
| H  | -0.333752 | 3.650021  | -3.761965 |
| H  | 3.641095  | 3.495759  | -3.109803 |
| H  | 3.787388  | 2.448221  | -1.661290 |
| H  | 3.289727  | 1.734909  | -3.199552 |
| Cl | -2.803564 | -2.474122 | -1.424571 |
| Cl | 2.755418  | -0.670601 | -2.566759 |
| Cl | -1.778952 | 3.115768  | -1.481613 |
| Cl | 4.318818  | 0.466467  | 3.997252  |
| H  | 2.959783  | 0.340025  | 4.016022  |

mofecl-hcl2

E(CH<sub>3</sub>CN)=-1196.172491 a. u.

|   |          |           |          |
|---|----------|-----------|----------|
| C | 3.379478 | -3.947581 | 0.257137 |
|---|----------|-----------|----------|

|    |           |           |           |
|----|-----------|-----------|-----------|
| C  | 4.074888  | -3.009775 | 1.256600  |
| P  | 2.841940  | -1.840340 | 2.105333  |
| Mo | 1.212641  | -0.858914 | 0.278801  |
| P  | 2.074039  | -3.115901 | -0.883243 |
| Mo | -1.482951 | -0.781962 | -0.439609 |
| P  | -3.662622 | -1.997409 | 0.367006  |
| C  | -4.811865 | -2.202684 | -1.131935 |
| C  | -4.924564 | -0.911764 | -1.959936 |
| P  | -3.279120 | 0.049737  | -2.242841 |
| S  | -2.334467 | 1.172479  | 0.862015  |
| Fe | -0.777054 | -0.097649 | 1.968984  |
| Cl | -1.445192 | -0.199749 | 4.127924  |
| Mo | -0.114664 | 1.621583  | -0.072500 |
| P  | -0.571349 | 3.824354  | 1.281879  |
| C  | 0.815098  | 5.100467  | 0.980741  |
| C  | 1.440254  | 4.942823  | -0.419069 |
| P  | 1.996187  | 3.143607  | -0.726998 |
| S  | 0.369661  | -0.004502 | -1.865591 |
| S  | -0.418926 | -2.273327 | 1.327725  |
| S  | 1.204748  | 1.026055  | 1.889894  |
| C  | 2.119232  | -2.848794 | 3.523204  |
| C  | 3.986487  | -0.648132 | 3.005083  |
| C  | 0.976304  | -4.627101 | -1.142052 |
| C  | 2.931596  | -2.985923 | -2.555011 |
| C  | 3.601974  | 3.145669  | 0.267757  |
| C  | 2.577027  | 3.180759  | -2.512959 |
| C  | -2.141180 | 4.768212  | 0.849638  |
| C  | -0.667534 | 3.705872  | 3.157978  |
| C  | -2.846251 | -0.243717 | -4.051479 |
| C  | -4.023430 | 1.783403  | -2.301235 |
| C  | -4.741325 | -1.191606 | 1.687278  |
| C  | -3.513044 | -3.765698 | 0.990004  |
| H  | 2.839005  | -4.738886 | 0.791706  |
| H  | 4.119646  | -4.438273 | -0.388053 |
| H  | 4.798351  | -2.364701 | 0.749298  |
| H  | 4.604662  | -3.589143 | 2.024847  |
| H  | 2.317163  | 5.595412  | -0.522700 |
| H  | 0.400284  | 6.107920  | 1.111380  |
| H  | 0.722427  | 5.198969  | -1.203452 |
| H  | 1.569609  | 4.952914  | 1.764106  |
| H  | -4.376128 | -3.010379 | -1.726639 |
| H  | -5.802978 | -2.519852 | -0.780448 |
| H  | -5.591995 | -0.199424 | -1.457809 |
| H  | -5.358968 | -1.125650 | -2.944844 |
| H  | 3.247303  | 4.033320  | -2.675662 |
| H  | 3.107040  | 2.255774  | -2.747880 |
| H  | 1.700125  | 3.264490  | -3.159247 |
| H  | 4.238356  | 3.969902  | -0.076638 |
| H  | 3.377880  | 3.274044  | 1.331097  |
| H  | 4.117196  | 2.194693  | 0.131141  |
| H  | -0.970869 | 4.667907  | 3.587041  |
| H  | -1.386206 | 2.928965  | 3.434507  |
| H  | 0.306980  | 3.413040  | 3.558458  |
| H  | -2.168672 | 5.721249  | 1.391206  |
| H  | -2.170251 | 4.939298  | -0.228476 |
| H  | -3.005632 | 4.161078  | 1.133136  |
| H  | -3.711435 | -0.035325 | -4.692291 |
| H  | -2.023117 | 0.426446  | -4.317491 |
| H  | -2.515327 | -1.276847 | -4.173756 |
| H  | -4.926570 | 1.759808  | -2.923701 |
| H  | -4.281158 | 2.104402  | -1.287857 |

|    |           |           |           |
|----|-----------|-----------|-----------|
| H  | -3.299365 | 2.486836  | -2.711212 |
| H  | -4.507505 | -4.219299 | 1.080595  |
| H  | -2.906187 | -4.333027 | 0.280270  |
| H  | -3.020561 | -3.766643 | 1.966280  |
| H  | -5.591789 | -1.838728 | 1.932117  |
| H  | -4.136894 | -1.019083 | 2.583566  |
| H  | -5.103024 | -0.222062 | 1.332468  |
| H  | 2.905920  | -3.124158 | 4.235340  |
| H  | 1.353344  | -2.250627 | 4.026677  |
| H  | 1.639190  | -3.751702 | 3.135155  |
| H  | 4.762219  | -1.206922 | 3.542099  |
| H  | 4.448000  | 0.018875  | 2.273418  |
| H  | 3.404289  | -0.055007 | 3.715456  |
| H  | 3.138339  | -3.990053 | -2.943449 |
| H  | 2.274681  | -2.454371 | -3.248738 |
| H  | 3.863892  | -2.427769 | -2.458876 |
| H  | 1.619329  | -5.495244 | -1.334124 |
| H  | 0.373104  | -4.799458 | -0.246737 |
| H  | 0.299326  | -4.460664 | -1.979498 |
| Cl | -0.949952 | 3.120015  | -1.978823 |
| Cl | -1.642696 | -2.808603 | -2.041695 |
| Cl | 3.602551  | -0.176253 | -0.599110 |
| Cl | 4.896002  | 0.147669  | -3.804810 |
| H  | 4.325930  | 0.016227  | -2.587862 |

mofecl-hcl3

$E(\text{CH}_3\text{CN}) = -1196.1693599$  a. u.

|    |           |           |           |
|----|-----------|-----------|-----------|
| C  | -0.696105 | 5.176450  | -0.897641 |
| C  | -2.060794 | 4.835162  | -0.281403 |
| P  | -1.959765 | 3.332061  | 0.875470  |
| Mo | -0.546359 | 1.462569  | -0.330842 |
| P  | 0.307578  | 3.673825  | -1.552033 |
| Mo | 1.806888  | -0.035572 | -0.044309 |
| P  | 3.821853  | -0.014206 | 1.634918  |
| C  | 5.374469  | -0.589060 | 0.700974  |
| C  | 5.110642  | -1.837165 | -0.156766 |
| P  | 3.458894  | -1.837147 | -1.145563 |
| S  | 1.015214  | -2.029075 | 1.247667  |
| Fe | 0.057998  | -0.039372 | 1.873431  |
| Cl | -0.123385 | -0.086999 | 4.127661  |
| Mo | -0.609922 | -1.362669 | -0.457834 |
| P  | -1.821314 | -3.419200 | 0.651759  |
| C  | -3.440215 | -3.829184 | -0.274654 |
| C  | -3.363465 | -3.434150 | -1.763822 |
| P  | -2.819472 | -1.615163 | -1.956964 |
| S  | 0.463710  | 0.110463  | -2.110948 |
| S  | 1.081038  | 1.958937  | 1.361930  |
| S  | -2.038521 | -0.015576 | 0.999695  |
| C  | -1.353005 | 4.031924  | 2.517068  |
| C  | -3.777382 | 3.004046  | 1.233812  |
| C  | 2.030152  | 4.396587  | -1.307186 |
| C  | 0.120076  | 3.743798  | -3.423396 |
| C  | -4.452980 | -0.761537 | -1.547133 |
| C  | -2.651956 | -1.376043 | -3.812231 |
| C  | -0.877332 | -5.047833 | 0.627168  |
| C  | -2.340811 | -3.285621 | 2.457838  |
| C  | 3.966311  | -1.540546 | -2.934487 |
| C  | 3.174390  | -3.703757 | -1.137053 |
| C  | 3.768756  | -1.103029 | 3.173677  |
| C  | 4.375803  | 1.643443  | 2.329918  |

|    |           |           |           |
|----|-----------|-----------|-----------|
| H  | -0.050300 | 5.654080  | -0.149474 |
| H  | -0.812847 | 5.885761  | -1.727131 |
| H  | -2.784421 | 4.565325  | -1.055969 |
| H  | -2.454756 | 5.691962  | 0.281931  |
| H  | -4.345622 | -3.552110 | -2.240503 |
| H  | -3.641993 | -4.902448 | -0.168099 |
| H  | -2.639084 | -4.052485 | -2.300919 |
| H  | -4.251447 | -3.291598 | 0.231829  |
| H  | 5.672804  | 0.257403  | 0.076128  |
| H  | 6.172863  | -0.786282 | 1.429204  |
| H  | 5.066459  | -2.730449 | 0.479649  |
| H  | 5.929094  | -1.988365 | -0.872454 |
| H  | -3.541780 | -1.753569 | -4.330388 |
| H  | -2.533497 | -0.306968 | -4.007762 |
| H  | -1.761850 | -1.909738 | -4.153781 |
| H  | -5.222017 | -1.108870 | -2.248059 |
| H  | -4.762286 | -1.000519 | -0.525772 |
| H  | -4.328002 | 0.317397  | -1.640014 |
| H  | -2.595551 | -4.275460 | 2.853526  |
| H  | -1.520566 | -2.853081 | 3.038364  |
| H  | -3.209256 | -2.628666 | 2.552526  |
| H  | -1.514694 | -5.851687 | 1.014223  |
| H  | -0.561306 | -5.267771 | -0.394328 |
| H  | 0.010510  | -4.948257 | 1.258244  |
| H  | 4.743840  | -2.253329 | -3.234410 |
| H  | 3.082865  | -1.674084 | -3.566305 |
| H  | 4.324158  | -0.514358 | -3.037838 |
| H  | 4.109363  | -4.205691 | -1.416341 |
| H  | 2.870979  | -4.022919 | -0.135664 |
| H  | 2.381974  | -3.962886 | -1.839212 |
| H  | 5.362870  | 1.544324  | 2.797650  |
| H  | 4.419871  | 2.365984  | 1.511627  |
| H  | 3.651442  | 1.985353  | 3.074271  |
| H  | 4.658891  | -0.934224 | 3.791225  |
| H  | 2.868292  | -0.864529 | 3.748671  |
| H  | 3.715569  | -2.156287 | 2.882760  |
| H  | -2.077584 | 4.751972  | 2.915007  |
| H  | -1.221046 | 3.208328  | 3.225751  |
| H  | -0.382833 | 4.518599  | 2.382691  |
| H  | -4.292361 | 3.952434  | 1.428518  |
| H  | -4.228667 | 2.509993  | 0.370769  |
| H  | -3.872361 | 2.361859  | 2.112934  |
| H  | 0.436999  | 4.724822  | -3.796738 |
| H  | 0.749242  | 2.963250  | -3.861535 |
| H  | -0.919974 | 3.547552  | -3.689793 |
| H  | 2.030235  | 5.433821  | -1.665325 |
| H  | 2.288690  | 4.365971  | -0.245162 |
| H  | 2.766394  | 3.803480  | -1.849062 |
| Cl | -0.018505 | -3.187137 | -2.152576 |
| Cl | 3.547528  | 1.459860  | -1.238802 |
| Cl | -2.446006 | 1.954176  | -2.025538 |
| Cl | -5.265470 | -0.504663 | 2.483182  |
| H  | -4.020451 | -0.229601 | 2.058554  |

mofecl-hcl4

E(CH<sub>3</sub>CN)= -1196.1666654 a. u.

|    |           |           |           |
|----|-----------|-----------|-----------|
| C  | -3.229725 | -4.152497 | 0.349337  |
| C  | -4.199648 | -3.222345 | -0.393890 |
| P  | -3.279108 | -1.953659 | -1.465359 |
| Mo | -1.317973 | -0.932379 | -0.053397 |

|    |           |           |           |
|----|-----------|-----------|-----------|
| P  | -1.721961 | -3.289146 | 1.175846  |
| Mo | 1.467332  | -0.702537 | 0.034762  |
| P  | 3.453912  | -1.752347 | -1.316121 |
| C  | 4.957655  | -1.854836 | -0.158679 |
| C  | 5.166549  | -0.551274 | 0.628247  |
| P  | 3.581563  | 0.195529  | 1.420211  |
| S  | 1.891147  | 1.346715  | -1.312338 |
| Fe | 0.204949  | 0.022890  | -2.130391 |
| Cl | 0.349566  | 0.079246  | -4.384670 |
| Mo | -0.099818 | 1.630444  | 0.085871  |
| P  | -0.018556 | 3.952333  | -1.135879 |
| C  | -0.777891 | 5.276599  | -0.006691 |
| C  | -2.099787 | 4.824891  | 0.634257  |
| P  | -2.203106 | 2.968823  | 1.151957  |
| S  | -0.053647 | -0.073269 | 1.861853  |
| S  | 0.106375  | -2.191859 | -1.521741 |
| S  | -1.773533 | 0.986629  | -1.564879 |
| C  | -2.882858 | -2.864620 | -3.066426 |
| C  | -4.673680 | -0.807151 | -1.995650 |
| C  | -0.531780 | -4.748238 | 1.071889  |
| C  | -2.129302 | -3.263467 | 3.013979  |
| C  | -4.001933 | 2.699952  | 0.636434  |
| C  | -2.321792 | 2.996802  | 3.029503  |
| C  | 1.669365  | 4.701312  | -1.495106 |
| C  | -0.905332 | 4.135619  | -2.788497 |
| C  | 3.691528  | -0.276893 | 3.240179  |
| C  | 4.150542  | 1.994020  | 1.462015  |
| C  | 4.103727  | -0.880640 | -2.856749 |
| C  | 3.279270  | -3.531095 | -1.901557 |
| H  | -2.798374 | -4.884054 | -0.346014 |
| H  | -3.758216 | -4.716666 | 1.128446  |
| H  | -4.798508 | -2.638236 | 0.310606  |
| H  | -4.878382 | -3.802538 | -1.033568 |
| H  | -2.927294 | 4.974301  | -0.070116 |
| H  | -0.022235 | 5.470188  | 0.759088  |
| H  | -2.316748 | 5.428962  | 1.523965  |
| H  | -0.927032 | 6.195666  | -0.589515 |
| H  | 4.756648  | -2.691193 | 0.517194  |
| H  | 5.849814  | -2.092389 | -0.753979 |
| H  | 5.560295  | 0.232128  | -0.032489 |
| H  | 5.901774  | -0.700537 | 1.429668  |
| H  | -3.101507 | 3.696973  | 3.352704  |
| H  | -2.572732 | 1.988538  | 3.370066  |
| H  | -1.354159 | 3.287580  | 3.443865  |
| H  | -4.606612 | 3.533373  | 1.015089  |
| H  | -4.063567 | 2.669406  | -0.455994 |
| H  | -4.365819 | 1.755818  | 1.039310  |
| H  | -0.735064 | 5.134542  | -3.206886 |
| H  | -0.523919 | 3.375283  | -3.477413 |
| H  | -1.978562 | 3.967763  | -2.659673 |
| H  | 1.555274  | 5.752898  | -1.784724 |
| H  | 2.283346  | 4.628290  | -0.594057 |
| H  | 2.151595  | 4.148045  | -2.305001 |
| H  | 4.670133  | 0.005419  | 3.646962  |
| H  | 2.905640  | 0.252538  | 3.787295  |
| H  | 3.529046  | -1.351211 | 3.343988  |
| H  | 5.188672  | 2.030363  | 1.815057  |
| H  | 4.086680  | 2.421463  | 0.457272  |
| H  | 3.506616  | 2.573316  | 2.123649  |
| H  | 4.254321  | -3.920286 | -2.218678 |
| H  | 2.886091  | -4.129661 | -1.076572 |



|    |           |           |           |
|----|-----------|-----------|-----------|
| H  | 2.579315  | -3.569725 | -2.740771 |
| H  | 4.916676  | -1.461510 | -3.308170 |
| H  | 3.285689  | -0.768919 | -3.575593 |
| H  | 4.462068  | 0.119737  | -2.597312 |
| H  | -3.806498 | -3.196162 | -3.555264 |
| H  | -2.333404 | -2.188994 | -3.729457 |
| H  | -2.242140 | -3.726424 | -2.859992 |
| H  | -5.517232 | -1.395894 | -2.375944 |
| H  | -4.991040 | -0.216826 | -1.132915 |
| H  | -4.313658 | -0.135891 | -2.779968 |
| H  | -2.428944 | -4.265577 | 3.343557  |
| H  | -1.238268 | -2.952970 | 3.567407  |
| H  | -2.928959 | -2.544511 | 3.199749  |
| H  | -1.059164 | -5.653288 | 1.398974  |
| H  | -0.192594 | -4.867733 | 0.038908  |
| H  | 0.340925  | -4.567083 | 1.698425  |
| Cl | 0.986621  | 3.143454  | 1.838160  |
| Cl | 2.110030  | -2.763351 | 1.450839  |
| Cl | -3.390990 | -0.491892 | 1.431698  |
| Cl | -0.097200 | -0.387248 | 5.436547  |
| H  | -0.091969 | -0.246430 | 4.099548  |

mofecl-hcl2sinhcl

$E(\text{CH}_3\text{CN}) = -1180.9950267$  a. u.

|    |           |           |           |
|----|-----------|-----------|-----------|
| C  | -2.612008 | -2.859262 | -3.467774 |
| P  | -3.099390 | -1.717447 | -2.048469 |
| C  | -4.188456 | -0.444823 | -2.903447 |
| C  | -4.356877 | -2.723936 | -1.043276 |
| C  | -3.682038 | -3.704295 | -0.070013 |
| P  | -2.106253 | -3.049772 | 0.814691  |
| C  | -2.573407 | -2.903527 | 2.629382  |
| Mo | -1.238538 | -0.830633 | -0.392466 |
| S  | -1.232583 | 1.104303  | -1.947143 |
| Mo | 0.242947  | 1.643518  | -0.074466 |
| S  | -0.217517 | -0.017395 | 1.675685  |
| Mo | 1.545721  | -0.862717 | 0.155573  |
| S  | 0.253316  | -2.292289 | -1.576351 |
| Fe | 0.727368  | -0.124636 | -2.058895 |
| C  | -1.093112 | -4.638845 | 0.782432  |
| P  | 3.636697  | -2.194436 | -0.712297 |
| C  | 3.353944  | -3.934943 | -1.363861 |
| P  | 3.435918  | -0.129799 | 1.891679  |
| C  | 4.288261  | 1.552157  | 1.855848  |
| S  | 2.393266  | 1.120972  | -1.161342 |
| C  | 4.784941  | -2.490558 | 0.770216  |
| C  | 4.994580  | -1.222218 | 1.613148  |
| C  | 4.755853  | -1.428093 | -2.022438 |
| C  | 2.994740  | -0.337738 | 3.707243  |
| P  | 0.722600  | 3.894882  | -1.347951 |
| C  | 0.741646  | 3.855324  | -3.230477 |
| P  | -1.790129 | 3.209816  | 0.710726  |
| C  | -2.292724 | 3.157450  | 2.518087  |
| C  | -0.601041 | 5.201803  | -0.941022 |
| C  | -1.182630 | 4.998007  | 0.470172  |
| C  | 2.346110  | 4.751303  | -0.938582 |
| C  | -3.413866 | 3.282694  | -0.244986 |
| Cl | 1.200521  | 3.000469  | 1.821243  |
| Cl | 1.617504  | -2.886493 | 1.709892  |
| Cl | -3.456314 | -0.021406 | 0.676199  |
| Cl | -4.620798 | 0.226107  | 4.026942  |

|   |           |           |           |
|---|-----------|-----------|-----------|
| H | -3.364790 | -4.609378 | -0.601633 |
| H | -4.391294 | -4.016189 | 0.705876  |
| H | -4.963421 | -1.992385 | -0.503862 |
| H | -5.009060 | -3.266056 | -1.740137 |
| H | -2.032948 | 5.671742  | 0.634476  |
| H | -0.147343 | 6.195872  | -1.034171 |
| H | -0.432873 | 5.197385  | 1.240558  |
| H | -1.385232 | 5.126757  | -1.704497 |
| H | 4.310939  | -3.278157 | 1.360853  |
| H | 5.747502  | -2.865695 | 0.399104  |
| H | 5.729644  | -0.564403 | 1.133327  |
| H | 5.392915  | -1.487769 | 2.599786  |
| H | -2.965249 | 3.992914  | 2.743795  |
| H | -2.801100 | 2.216946  | 2.735007  |
| H | -1.392543 | 3.228091  | 3.132923  |
| H | -4.037236 | 4.081502  | 0.173204  |
| H | -3.215815 | 3.489438  | -1.300740 |
| H | -3.934148 | 2.328825  | -0.161752 |
| H | 0.885407  | 4.865884  | -3.629135 |
| H | 1.563693  | 3.217880  | -3.569770 |
| H | -0.200623 | 3.445389  | -3.604359 |
| H | 2.425928  | 5.686366  | -1.504451 |
| H | 2.389312  | 4.954684  | 0.133140  |
| H | 3.176187  | 4.090867  | -1.204025 |
| H | 3.878256  | -0.167148 | 4.332813  |
| H | 2.221037  | 0.391595  | 3.963810  |
| H | 2.604135  | -1.344459 | 3.868039  |
| H | 5.163797  | 1.514407  | 2.514923  |
| H | 4.611004  | 1.780092  | 0.835770  |
| H | 3.605171  | 2.330997  | 2.193085  |
| H | 4.313893  | -4.450126 | -1.483054 |
| H | 2.729714  | -4.477407 | -0.649947 |
| H | 2.841375  | -3.893753 | -2.328910 |
| H | 5.625201  | -2.070739 | -2.201272 |
| H | 4.197630  | -1.313468 | -2.956997 |
| H | 5.090445  | -0.437761 | -1.701385 |
| H | -3.504775 | -3.163431 | -4.025851 |
| H | -1.928097 | -2.334655 | -4.141623 |
| H | -2.099546 | -3.745691 | -3.084275 |
| H | -5.036594 | -0.946512 | -3.383078 |
| H | -4.554128 | 0.267560  | -2.160516 |
| H | -3.608768 | 0.091590  | -3.659488 |
| H | -2.856259 | -3.888992 | 3.016142  |
| H | -1.710381 | -2.529500 | 3.186814  |
| H | -3.405106 | -2.208979 | 2.754430  |
| H | -1.733544 | -5.463851 | 1.116786  |
| H | -0.741228 | -4.833956 | -0.234683 |
| H | -0.228709 | -4.546054 | 1.438929  |
| H | -4.153773 | 0.134576  | 2.778509  |

mofecl-hcl3sinhcl

E(CH<sub>3</sub>CN) = -1180.9913293 a. u.

|    |           |          |           |
|----|-----------|----------|-----------|
| C  | 1.317121  | 4.240950 | -2.550817 |
| P  | 1.953750  | 3.428059 | -0.973096 |
| C  | 3.751792  | 3.074873 | -1.396687 |
| C  | 2.102932  | 4.855925 | 0.267126  |
| C  | 0.763070  | 5.192505 | 0.938466  |
| P  | -0.332657 | 3.687962 | 1.413058  |
| C  | -0.307523 | 3.615738 | 3.290706  |
| Mo | 0.540508  | 1.504617 | 0.160851  |

|    |           |           |           |
|----|-----------|-----------|-----------|
| S  | 2.038578  | 0.010270  | -1.145922 |
| Mo | 0.645178  | -1.392556 | 0.299757  |
| S  | -0.425955 | 0.107516  | 1.917615  |
| Mo | -1.823818 | -0.069808 | -0.123355 |
| S  | -1.096900 | 1.981173  | -1.527835 |
| Fe | -0.136738 | -0.045072 | -1.919051 |
| C  | -2.017409 | 4.444573  | 1.043833  |
| P  | -3.910812 | -0.067925 | -1.716466 |
| C  | -4.472054 | 1.585850  | -2.411898 |
| P  | -3.410662 | -1.876076 | 1.049358  |
| C  | -3.109626 | -3.737783 | 1.012114  |
| S  | -0.989476 | -2.083475 | -1.408407 |
| C  | -5.412778 | -0.621416 | -0.695534 |
| C  | -5.110140 | -1.867480 | 0.150944  |
| C  | -3.944800 | -1.195738 | -3.227631 |
| C  | -3.803978 | -1.566878 | 2.862613  |
| P  | 1.874489  | -3.470637 | -0.763281 |
| C  | 2.372470  | -3.390630 | -2.577084 |
| P  | 2.877544  | -1.581195 | 1.780079  |
| C  | 2.705270  | -1.297113 | 3.627477  |
| C  | 3.509806  | -3.825883 | 0.149305  |
| C  | 3.444738  | -3.392386 | 1.626163  |
| C  | 0.947854  | -5.106210 | -0.680615 |
| C  | 4.476478  | -0.696708 | 1.314601  |
| Cl | 0.086676  | -3.149799 | 2.012474  |
| Cl | -3.484963 | 1.428521  | 1.102886  |
| Cl | 2.398840  | 1.953419  | 1.856878  |
| Cl | 5.261240  | -0.520043 | -2.716251 |
| H  | 0.145104  | 5.805169  | 0.270904  |
| H  | 0.933220  | 5.777580  | 1.850197  |
| H  | 2.841658  | 4.535518  | 1.005862  |
| H  | 2.497892  | 5.734553  | -0.259253 |
| H  | 4.434633  | -3.479066 | 2.091686  |
| H  | 3.722403  | -4.898894 | 0.070665  |
| H  | 2.743022  | -4.010327 | 2.192832  |
| H  | 4.308311  | -3.295574 | -0.383850 |
| H  | -5.676383 | 0.229594  | -0.062360 |
| H  | -6.248775 | -0.818236 | -1.379209 |
| H  | -5.112052 | -2.765512 | -0.479580 |
| H  | -5.887309 | -2.006052 | 0.912488  |
| H  | 3.605840  | -1.645394 | 4.146351  |
| H  | 2.568511  | -0.227695 | 3.804196  |
| H  | 1.831525  | -1.843161 | 3.990442  |
| H  | 5.252432  | -0.971167 | 2.038869  |
| H  | 4.800946  | -0.994886 | 0.313928  |
| H  | 4.321073  | 0.381735  | 1.340000  |
| H  | 2.878851  | -4.317810 | -2.867999 |
| H  | 1.474746  | -3.266960 | -3.190290 |
| H  | 3.044852  | -2.548154 | -2.754608 |
| H  | 1.578036  | -5.904900 | -1.088101 |
| H  | 0.683568  | -5.326111 | 0.355196  |
| H  | 0.030364  | -5.029917 | -1.270795 |
| H  | -4.561196 | -2.279249 | 3.209433  |
| H  | -2.887324 | -1.698383 | 3.444919  |
| H  | -4.161111 | -0.542824 | 2.986146  |
| H  | -4.029875 | -4.245299 | 1.325493  |
| H  | -2.848915 | -4.052478 | -0.002413 |
| H  | -2.294535 | -4.002562 | 1.684740  |
| H  | -5.472363 | 1.488322  | -2.849067 |
| H  | -4.492792 | 2.316825  | -1.600349 |
| H  | -3.771744 | 1.923676  | -3.180865 |

|   |           |           |           |
|---|-----------|-----------|-----------|
| H | -4.918078 | -1.129620 | -3.726860 |
| H | -3.162063 | -0.892352 | -3.930097 |
| H | -3.754606 | -2.230711 | -2.930553 |
| H | 2.005354  | 5.032425  | -2.867892 |
| H | 1.242206  | 3.490360  | -3.343486 |
| H | 0.322096  | 4.663410  | -2.387427 |
| H | 4.277527  | 4.017992  | -1.584487 |
| H | 4.223455  | 2.555109  | -0.560108 |
| H | 3.811809  | 2.452756  | -2.293520 |
| H | -0.583492 | 4.592294  | 3.704480  |
| H | -1.029670 | 2.863907  | 3.621503  |
| H | 0.689383  | 3.328855  | 3.630329  |
| H | -2.055862 | 5.444229  | 1.492863  |
| H | -2.156639 | 4.520849  | -0.038477 |
| H | -2.810345 | 3.818343  | 1.450652  |
| H | 4.078495  | -0.182377 | -2.194117 |

mofecl-hcl4sinhcl

E(CH<sub>3</sub>CN)= -1180.9883792 a. u.

|    |           |           |           |
|----|-----------|-----------|-----------|
| C  | -3.959882 | -1.588600 | -3.075034 |
| P  | -3.876868 | -0.545392 | -1.507514 |
| C  | -4.704724 | 1.057337  | -2.039011 |
| C  | -5.172377 | -1.314326 | -0.354865 |
| C  | -4.622552 | -2.541295 | 0.385009  |
| P  | -2.861688 | -2.340143 | 1.119900  |
| C  | -3.113741 | -2.092965 | 2.966881  |
| Mo | -1.599680 | -0.367958 | -0.191695 |
| S  | -1.273194 | 1.582998  | -1.704763 |
| Mo | 0.576256  | 1.561256  | -0.104252 |
| S  | -0.043456 | -0.031656 | 1.658082  |
| Mo | 1.106785  | -1.237181 | -0.166835 |
| S  | -0.828635 | -2.108413 | -1.658279 |
| Fe | 0.184030  | -0.140825 | -2.185392 |
| C  | -2.329873 | -4.145226 | 1.023157  |
| P  | 2.522185  | -3.026404 | -1.464885 |
| C  | 1.645302  | -4.595313 | -2.015909 |
| P  | 3.412457  | -1.190215 | 1.204579  |
| C  | 4.641791  | 0.240266  | 1.184892  |
| S  | 2.263359  | 0.511882  | -1.561318 |
| C  | 3.852397  | -3.677943 | -0.278536 |
| C  | 4.563510  | -2.534616 | 0.459407  |
| C  | 3.490329  | -2.524502 | -3.003900 |
| C  | 3.307533  | -1.596691 | 3.038747  |
| P  | 1.555758  | 3.697264  | -1.288518 |
| C  | 0.768756  | 4.280633  | -2.898278 |
| P  | -0.833732 | 3.603445  | 0.986017  |
| C  | -0.956534 | 3.590495  | 2.862398  |
| C  | 1.405098  | 5.170998  | -0.104539 |
| C  | 0.016797  | 5.272690  | 0.545016  |
| C  | 3.394076  | 3.714754  | -1.683729 |
| C  | -2.579824 | 4.068413  | 0.439064  |
| Cl | 0.873822  | -3.320482 | 1.276807  |
| Cl | 2.151175  | 2.466775  | 1.635742  |
| Cl | -3.239311 | 0.899416  | 1.292575  |
| Cl | -0.114113 | -0.247905 | 5.337704  |
| H  | -4.560815 | -3.400651 | -0.294403 |
| H  | -5.292962 | -2.824685 | 1.205617  |
| H  | -5.462040 | -0.527512 | 0.346809  |
| H  | -6.052795 | -1.588484 | -0.950372 |
| H  | -0.679245 | 5.783114  | -0.130873 |

|   |           |           |           |
|---|-----------|-----------|-----------|
| H | 2.179355  | 5.019937  | 0.651453  |
| H | 0.071946  | 5.867150  | 1.464500  |
| H | 1.637870  | 6.089769  | -0.658207 |
| H | 3.338089  | -4.341363 | 0.421862  |
| H | 4.575880  | -4.271913 | -0.851878 |
| H | 5.236450  | -2.000357 | -0.223530 |
| H | 5.179172  | -2.931986 | 1.275862  |
| H | -1.430541 | 4.514943  | 3.211670  |
| H | -1.565176 | 2.734197  | 3.163591  |
| H | 0.043155  | 3.496283  | 3.291493  |
| H | -2.833664 | 5.040225  | 0.879257  |
| H | -2.615851 | 4.144228  | -0.652018 |
| H | -3.291844 | 3.315038  | 0.771781  |
| H | 1.292529  | 5.165309  | -3.277200 |
| H | 0.828839  | 3.479843  | -3.641535 |
| H | -0.286127 | 4.520350  | -2.738329 |
| H | 3.704250  | 4.731135  | -1.952311 |
| H | 3.948260  | 3.383675  | -0.801896 |
| H | 3.606291  | 3.037913  | -2.515185 |
| H | 4.316173  | -1.701721 | 3.454585  |
| H | 2.790536  | -0.782472 | 3.554555  |
| H | 2.742536  | -2.519880 | 3.178147  |
| H | 5.616055  | -0.134483 | 1.520667  |
| H | 4.735070  | 0.639714  | 0.171142  |
| H | 4.304169  | 1.036605  | 1.847397  |
| H | 2.381466  | -5.348177 | -2.320112 |
| H | 1.050818  | -4.974480 | -1.181649 |
| H | 0.982630  | -4.374659 | -2.857487 |
| H | 4.070082  | -3.374972 | -3.379997 |
| H | 2.795069  | -2.194841 | -3.782496 |
| H | 4.163948  | -1.694545 | -2.772973 |
| H | -4.973008 | -1.561128 | -3.491499 |
| H | -3.255935 | -1.192689 | -3.813242 |
| H | -3.680098 | -2.622794 | -2.857444 |
| H | -5.727646 | 0.852159  | -2.375115 |
| H | -4.728156 | 1.743431  | -1.189628 |
| H | -4.139404 | 1.514118  | -2.855777 |
| H | -3.751543 | -2.892019 | 3.361650  |
| H | -2.141618 | -2.132089 | 3.466322  |
| H | -3.570487 | -1.119315 | 3.151110  |
| H | -3.160853 | -4.768240 | 1.375376  |
| H | -2.086103 | -4.405351 | -0.010658 |
| H | -1.447744 | -4.313293 | 1.639393  |
| H | -0.097056 | -0.133110 | 4.012729  |

mofecl-mcn (los dos coordinados)

E(CH<sub>3</sub>CN)= -1313.3715231 a. u.

|    |             |             |             |
|----|-------------|-------------|-------------|
| C  | 2.16264400  | -4.56064700 | -1.54591100 |
| C  | 2.53539700  | -4.66589100 | -0.05246500 |
| P  | 2.60141700  | -2.95199800 | 0.79095700  |
| Mo | 0.99539200  | -1.26809300 | -0.41633000 |
| P  | 0.59245400  | -3.50524700 | -1.77303100 |
| Mo | -1.59897700 | -0.23519900 | -0.23913200 |
| P  | -3.89031300 | -0.63720000 | 1.03811800  |
| C  | -5.27107800 | -0.66185200 | -0.27253800 |
| C  | -5.16367700 | 0.48301400  | -1.30445300 |
| P  | -3.39343700 | 1.20024500  | -1.55638900 |
| S  | -1.26407900 | 1.70774000  | 1.25403700  |
| Fe | -0.00647800 | -0.05233800 | 2.07022500  |
| Cl | -1.70071100 | -0.44950000 | 3.75636200  |

|    |             |             |             |
|----|-------------|-------------|-------------|
| Mo | 0.54449200  | 1.54028800  | -0.37788400 |
| P  | 1.30201400  | 3.69720600  | 0.87643900  |
| C  | 2.83045400  | 4.47986100  | 0.03165700  |
| C  | 2.89368200  | 4.16568900  | -1.47779500 |
| P  | 2.69018900  | 2.29582700  | -1.80067300 |
| S  | -0.12901100 | 0.00992500  | -2.17326600 |
| S  | -0.64345100 | -2.06836400 | 1.14204700  |
| S  | 2.13141300  | 0.36574100  | 0.98500300  |
| C  | 2.31407700  | -3.37347600 | 2.60560400  |
| C  | 4.44019300  | -2.53929100 | 0.78081100  |
| C  | -0.72177800 | -4.74384600 | -1.22959700 |
| C  | 0.36519900  | -3.41025800 | -3.63426300 |
| C  | 4.42427900  | 1.69844400  | -1.35095200 |
| C  | 2.65216300  | 2.16372600  | -3.67421300 |
| C  | 0.07102200  | 5.11826000  | 0.97067500  |
| C  | 1.85365400  | 3.54525300  | 2.67134500  |
| C  | -3.22455900 | 1.26063500  | -3.42935400 |
| C  | -3.70997200 | 3.01050700  | -1.11569200 |
| C  | -4.56668100 | 0.64447100  | 2.24681400  |
| C  | -4.16926300 | -2.27696300 | 1.91369500  |
| H  | 1.98119600  | -5.55833700 | -1.96693900 |
| H  | 2.96119900  | -4.07772000 | -2.11569500 |
| H  | 3.50995300  | -5.15480600 | 0.07266600  |
| H  | 1.79333900  | -5.26401100 | 0.49172500  |
| H  | 3.85620100  | 4.49122900  | -1.89486600 |
| H  | 2.80525800  | 5.56398500  | 0.20133000  |
| H  | 2.08971000  | 4.67394400  | -2.01733000 |
| H  | 3.71704300  | 4.08783900  | 0.54727500  |
| H  | -5.18569000 | -1.62738900 | -0.77474100 |
| H  | -6.23661200 | -0.62012500 | 0.24931600  |
| H  | -5.79765800 | 1.32909800  | -1.01217000 |
| H  | -5.50757800 | 0.13273800  | -2.28389100 |
| H  | 3.48501900  | 2.72139600  | -4.11962800 |
| H  | 2.72744800  | 1.10613700  | -3.94096700 |
| H  | 1.69884600  | 2.56178600  | -4.03079600 |
| H  | 5.16435200  | 2.20413100  | -1.98350800 |
| H  | 4.62887900  | 1.91922900  | -0.29867400 |
| H  | 4.47462700  | 0.61903800  | -1.50401500 |
| H  | 2.20590200  | 4.51138600  | 3.05201100  |
| H  | 1.00465500  | 3.20021200  | 3.26858500  |
| H  | 2.65178600  | 2.80107700  | 2.74279200  |
| H  | 0.51565000  | 5.97213100  | 1.49585800  |
| H  | -0.22188200 | 5.40148600  | -0.04232700 |
| H  | -0.81782700 | 4.77380900  | 1.50725300  |
| H  | -4.09888300 | 1.75027100  | -3.87550600 |
| H  | -2.31909000 | 1.81961000  | -3.67915100 |
| H  | -3.13487400 | 0.23655900  | -3.80070700 |
| H  | -4.53408300 | 3.39770400  | -1.72805000 |
| H  | -3.97452900 | 3.08874100  | -0.05670600 |
| H  | -2.80449100 | 3.59053200  | -1.30220600 |
| H  | -5.21866700 | -2.36929500 | 2.22019700  |
| H  | -3.90984100 | -3.08651500 | 1.22571600  |
| H  | -3.51548400 | -2.31251400 | 2.78797000  |
| H  | -5.56487000 | 0.34118400  | 2.58663500  |
| H  | -3.88136300 | 0.71514200  | 3.09327000  |
| H  | -4.62883800 | 1.61924700  | 1.75246700  |
| H  | 3.00299200  | -4.16301400 | 2.92913100  |
| H  | 2.47423700  | -2.47457400 | 3.20753700  |
| H  | 1.27926900  | -3.69569100 | 2.74859900  |
| H  | 5.01212100  | -3.34481100 | 1.25717700  |
| H  | 4.76501300  | -2.39798400 | -0.25205700 |

|    |             |             |             |
|----|-------------|-------------|-------------|
| H  | 4.59621400  | -1.60361100 | 1.32622400  |
| H  | 0.41128800  | -4.41148300 | -4.07927800 |
| H  | -0.61123900 | -2.96001900 | -3.83282900 |
| H  | 1.15120400  | -2.77538100 | -4.05037100 |
| H  | -0.60065500 | -5.67712900 | -1.79368100 |
| H  | -0.62409800 | -4.94059900 | -0.15806800 |
| H  | -1.70710600 | -4.31233400 | -1.41368300 |
| Cl | -0.34529800 | 3.37185900  | -1.97614800 |
| Cl | -2.74990700 | -2.03727600 | -1.76726200 |
| Cl | 2.97143700  | -1.33533800 | -2.14245000 |
| C  | 2.12583600  | 0.12294500  | 6.05106500  |
| H  | 3.16697000  | 0.46487200  | 6.03266700  |
| H  | 1.54228400  | 0.80701300  | 6.67864800  |
| H  | 2.09179200  | -0.87322800 | 6.50810600  |
| C  | 1.56209100  | 0.08174800  | 4.70062100  |
| N  | 1.04607000  | 0.04046100  | 3.64772400  |

mofe(cl..HCl)(mcn) (los dos grupos coordinados)

E(CH<sub>3</sub>CN)= -1328.93086 a. u.

|    |             |             |             |
|----|-------------|-------------|-------------|
| C  | -2.92224700 | -2.67384100 | -3.48853700 |
| C  | -3.58763000 | -3.15705600 | -2.18337000 |
| P  | -2.40723000 | -3.03640500 | -0.68496000 |
| Mo | -0.64273000 | -1.13079300 | -1.04872600 |
| P  | -2.12505700 | -0.96286100 | -3.23904400 |
| Mo | -0.19475100 | 1.57807200  | -0.45251900 |
| P  | -1.48271200 | 3.72011900  | 0.45686700  |
| C  | -1.11524300 | 5.15254600  | -0.74273200 |
| C  | 0.38081000  | 5.27519400  | -1.10304900 |
| P  | 1.38099200  | 3.63147600  | -1.01717700 |
| S  | 0.92370300  | 1.44227200  | 1.75104300  |
| Fe | -0.79278700 | -0.09469200 | 1.73976100  |
| Cl | -2.23138600 | 1.44290900  | 3.02220400  |
| Mo | 1.75717400  | -0.27428400 | 0.21405600  |
| P  | 3.26903900  | -0.79432400 | 2.28574600  |
| C  | 4.53606800  | -2.16728000 | 1.87546700  |
| C  | 4.91894300  | -2.18229000 | 0.38126500  |
| P  | 3.36166100  | -2.21910300 | -0.72138900 |
| S  | 1.07917900  | 0.27444400  | -2.07326000 |
| S  | -2.27299600 | 0.27801700  | -0.01485000 |
| S  | 0.35840000  | -2.08407600 | 0.95945800  |
| C  | -3.58711200 | -2.94798900 | 0.77816400  |
| C  | -1.72691100 | -4.78645700 | -0.52970700 |
| C  | -3.65775300 | 0.13475300  | -3.27050300 |
| C  | -1.27779800 | -0.59351000 | -4.87233100 |
| C  | 2.89795200  | -4.04261800 | -0.56177700 |
| C  | 4.04148700  | -2.08763300 | -2.46764700 |
| C  | 4.33572000  | 0.60762200  | 2.95136500  |
| C  | 2.46494000  | -1.43712000 | 3.86410100  |
| C  | 2.27544900  | 3.58871200  | -2.67114700 |
| C  | 2.74174900  | 4.15086500  | 0.18601000  |
| C  | -1.01891700 | 4.51872100  | 2.10367000  |
| C  | -3.36248700 | 3.71126400  | 0.46571500  |
| H  | -3.66548400 | -2.60184500 | -4.29357700 |
| H  | -2.12935800 | -3.35799400 | -3.80367800 |
| H  | -3.92254400 | -4.19770800 | -2.27915000 |
| H  | -4.46978900 | -2.54827300 | -1.94752400 |
| H  | 5.53103600  | -3.06530300 | 0.15333200  |
| H  | 5.42462200  | -2.02219400 | 2.50329400  |
| H  | 5.48608100  | -1.28667900 | 0.11292000  |
| H  | 4.08005600  | -3.12262400 | 2.16705400  |
| H  | -1.70334500 | 4.94869300  | -1.63942900 |

|    |             |             |             |
|----|-------------|-------------|-------------|
| H  | -1.47877700 | 6.08270100  | -0.28508400 |
| H  | 0.88562300  | 5.97468000  | -0.42554500 |
| H  | 0.48882800  | 5.66568500  | -2.12118800 |
| H  | 4.85450000  | -2.80709400 | -2.62321400 |
| H  | 3.22536500  | -2.29073300 | -3.16631200 |
| H  | 4.40598700  | -1.06892900 | -2.62151600 |
| H  | 3.74660300  | -4.66696900 | -0.86723500 |
| H  | 2.63208300  | -4.26646800 | 0.47594900  |
| H  | 2.03612100  | -4.24471700 | -1.19986600 |
| H  | 3.22656400  | -1.65881200 | 4.62122900  |
| H  | 1.77917700  | -0.67391500 | 4.24296700  |
| H  | 1.88875900  | -2.33869400 | 3.63952200  |
| H  | 4.95740200  | 0.24654600  | 3.77929800  |
| H  | 4.95985500  | 0.99637600  | 2.14447200  |
| H  | 3.67999600  | 1.40920400  | 3.30360600  |
| H  | 2.77555800  | 4.54670400  | -2.85907100 |
| H  | 3.01386200  | 2.78316900  | -2.64699900 |
| H  | 1.53980400  | 3.38612100  | -3.45384100 |
| H  | 3.22350500  | 5.06755500  | -0.17675700 |
| H  | 2.30303500  | 4.33225900  | 1.17224300  |
| H  | 3.47914100  | 3.35075800  | 0.26613300  |
| H  | -3.74381200 | 4.72051000  | 0.66384900  |
| H  | -3.71043400 | 3.36757800  | -0.51223300 |
| H  | -3.70671100 | 3.02227500  | 1.23953000  |
| H  | -1.63623400 | 5.41124800  | 2.26444200  |
| H  | -1.18189800 | 3.80164400  | 2.90897000  |
| H  | 0.03732700  | 4.80613700  | 2.08638600  |
| H  | -4.32779400 | -3.75480500 | 0.72356800  |
| H  | -3.01632200 | -3.04337700 | 1.70561900  |
| H  | -4.09501900 | -1.98131300 | 0.80010000  |
| H  | -2.55076400 | -5.50422300 | -0.43755600 |
| H  | -1.11800900 | -5.01149200 | -1.40775900 |
| H  | -1.09131300 | -4.83995200 | 0.35927400  |
| H  | -1.96881700 | -0.74861300 | -5.70958800 |
| H  | -0.94716300 | 0.44850400  | -4.85112000 |
| H  | -0.40997600 | -1.24992700 | -4.97275900 |
| H  | -4.22532200 | -0.05426800 | -4.19018400 |
| H  | -4.28345600 | -0.07518700 | -2.39799700 |
| H  | -3.34075100 | 1.17822600  | -3.22797200 |
| Cl | 3.93812800  | 0.93688300  | -0.45341400 |
| Cl | -1.29161400 | 2.54228200  | -2.63942200 |
| Cl | 0.34116900  | -2.96218200 | -2.62740200 |
| Cl | -4.72785900 | -0.65859000 | 3.79013000  |
| H  | -3.72272800 | 0.23701700  | 3.43784200  |
| C  | -1.85374600 | -2.37992600 | 5.49869600  |
| H  | -1.59480700 | -3.44481400 | 5.48646400  |
| H  | -1.39534200 | -1.91540000 | 6.37962700  |
| H  | -2.94293700 | -2.27574200 | 5.57274200  |
| C  | -1.39944800 | -1.71813200 | 4.27525200  |
| N  | -1.09228200 | -1.14863400 | 3.29670000  |

mofe-cl...mcn

E(CH<sub>3</sub>CN)= -1313.3641584 a. u.

|    |           |           |           |
|----|-----------|-----------|-----------|
| C  | 1.669076  | -4.554200 | -1.909060 |
| C  | 2.376677  | -4.604957 | -0.540041 |
| P  | 2.609012  | -2.870555 | 0.234427  |
| Mo | 0.712963  | -1.251480 | -0.617365 |
| P  | 0.067558  | -3.529680 | -1.795082 |
| Mo | -1.772088 | -0.268484 | 0.140508  |
| P  | -3.464017 | -0.763931 | 2.081120  |
| C  | -5.221276 | -0.516746 | 1.398377  |



|    |           |           |           |
|----|-----------|-----------|-----------|
| C  | -5.349011 | 0.787120  | 0.593553  |
| P  | -3.904705 | 1.143774  | -0.626979 |
| S  | -1.200817 | 1.821794  | 1.399696  |
| Fe | 0.236913  | 0.065949  | 1.752474  |
| Cl | 0.757705  | 0.159458  | 3.977654  |
| Mo | 0.250467  | 1.528615  | -0.554064 |
| P  | 1.302406  | 3.687848  | 0.506892  |
| C  | 2.631781  | 4.431706  | -0.646666 |
| C  | 2.356744  | 4.106458  | -2.129298 |
| P  | 2.081965  | 2.235122  | -2.373009 |
| S  | -0.812829 | -0.045495 | -2.113840 |
| S  | -0.443325 | -2.089038 | 1.318200  |
| S  | 2.139554  | 0.411115  | 0.531266  |
| C  | 2.709865  | -3.251027 | 2.075820  |
| C  | 4.390881  | -2.421786 | -0.175170 |
| C  | -1.069763 | -4.773402 | -0.949112 |
| C  | -0.590373 | -3.459620 | -3.551297 |
| C  | 3.870276  | 1.636769  | -2.290454 |
| C  | 1.641850  | 2.078700  | -4.192234 |
| C  | 0.134111  | 5.128462  | 0.825075  |
| C  | 2.199824  | 3.518173  | 2.154573  |
| C  | -4.611851 | 0.753228  | -2.327988 |
| C  | -4.001442 | 3.026975  | -0.593430 |
| C  | -3.424617 | 0.283725  | 3.649041  |
| C  | -3.548550 | -2.513268 | 2.767048  |
| H  | 1.412814  | -5.567107 | -2.247285 |
| H  | 2.304801  | -4.082253 | -2.662741 |
| H  | 3.363898  | -5.074690 | -0.632808 |
| H  | 1.795469  | -5.200438 | 0.175644  |
| H  | 3.206012  | 4.416959  | -2.752369 |
| H  | 2.668679  | 5.516659  | -0.486589 |
| H  | 1.457076  | 4.616219  | -2.484876 |
| H  | 3.598854  | 4.018630  | -0.332479 |
| H  | -5.417109 | -1.386678 | 0.764700  |
| H  | -5.933697 | -0.524286 | 2.234534  |
| H  | -5.379550 | 1.650233  | 1.271381  |
| H  | -6.283875 | 0.792387  | 0.018207  |
| H  | 2.375414  | 2.608362  | -4.812110 |
| H  | 1.633005  | 1.016944  | -4.451433 |
| H  | 0.645110  | 2.499756  | -4.344306 |
| H  | 4.475922  | 2.203484  | -3.008420 |
| H  | 4.265797  | 1.778861  | -1.280532 |
| H  | 3.900857  | 0.573835  | -2.532344 |
| H  | 2.512472  | 4.501970  | 2.524351  |
| H  | 1.533563  | 3.039000  | 2.878223  |
| H  | 3.074499  | 2.873974  | 2.025627  |
| H  | 0.697622  | 6.003874  | 1.168877  |
| H  | -0.406346 | 5.357663  | -0.095852 |
| H  | -0.588054 | 4.831592  | 1.590982  |
| H  | -5.553997 | 1.292616  | -2.482703 |
| H  | -3.881888 | 1.064828  | -3.081273 |
| H  | -4.765651 | -0.324600 | -2.410655 |
| H  | -5.048543 | 3.332996  | -0.711474 |
| H  | -3.613152 | 3.394542  | 0.360824  |
| H  | -3.390017 | 3.443082  | -1.394377 |
| H  | -4.454197 | -2.638024 | 3.372970  |
| H  | -3.557687 | -3.214458 | 1.929427  |
| H  | -2.665532 | -2.703698 | 3.383494  |
| H  | -4.179450 | -0.068139 | 4.362433  |
| H  | -2.429116 | 0.215769  | 4.099238  |
| H  | -3.610950 | 1.332485  | 3.399991  |

|    |           |           |           |
|----|-----------|-----------|-----------|
| H  | 3.567087  | -3.903082 | 2.279615  |
| H  | 2.824600  | -2.314766 | 2.627198  |
| H  | 1.784774  | -3.731169 | 2.405375  |
| H  | 5.034995  | -3.293830 | -0.007788 |
| H  | 4.449247  | -2.103000 | -1.217490 |
| H  | 4.716226  | -1.612121 | 0.484144  |
| H  | -0.628453 | -4.463581 | -3.990716 |
| H  | -1.596002 | -3.030666 | -3.520728 |
| H  | 0.061668  | -2.812979 | -4.143220 |
| H  | -1.080247 | -5.706387 | -1.526032 |
| H  | -0.715154 | -4.968600 | 0.067044  |
| H  | -2.074953 | -4.353241 | -0.889876 |
| Cl | -0.916877 | 3.329626  | -1.968563 |
| Cl | -3.278474 | -2.126409 | -0.884708 |
| Cl | 2.239341  | -1.341890 | -2.719349 |
| C  | 4.334109  | 0.472955  | 4.871216  |
| H  | 4.689577  | 1.497638  | 5.029172  |
| H  | 3.241283  | 0.484269  | 4.767800  |
| H  | 4.599990  | -0.131511 | 5.746094  |
| C  | 4.931815  | -0.094896 | 3.657902  |
| N  | 5.378861  | -0.557088 | 2.668446  |

mofe-mcn...cl

$E(\text{CH}_3\text{CN}) = -1313.3595247$  a. u.

|    |           |           |           |
|----|-----------|-----------|-----------|
| C  | -1.059824 | 5.021336  | -1.253216 |
| C  | -0.817870 | 5.222764  | 0.257430  |
| P  | -1.161062 | 3.631214  | 1.258216  |
| Mo | -0.712380 | 1.510883  | -0.234506 |
| P  | -0.115383 | 3.491602  | -1.882523 |
| Mo | 1.284323  | -0.332831 | -0.816102 |
| P  | 3.868098  | -0.651976 | -0.320302 |
| C  | 4.644984  | -1.235035 | -1.954845 |
| C  | 3.887158  | -2.417602 | -2.583613 |
| P  | 1.971079  | -2.334439 | -2.422710 |
| S  | 0.890626  | -2.142234 | 0.890854  |
| Fe | 0.569529  | -0.021785 | 1.653810  |
| Cl | 4.607518  | 0.263574  | 3.618184  |
| Mo | -1.213968 | -1.266476 | -0.036530 |
| P  | -2.123560 | -3.028199 | 1.680360  |
| C  | -4.026156 | -3.149326 | 1.579192  |
| C  | -4.544005 | -2.828056 | 0.162699  |
| P  | -3.861110 | -1.154540 | -0.448248 |
| S  | -0.786346 | -0.045729 | -2.116445 |
| S  | 1.524792  | 1.766211  | 0.612157  |
| S  | -1.706092 | 0.363933  | 1.733885  |
| C  | -0.147807 | 3.875641  | 2.827476  |
| C  | -2.916859 | 3.883280  | 1.891686  |
| C  | 1.636330  | 4.183513  | -1.949861 |
| C  | -0.610696 | 3.327538  | -3.684586 |
| C  | -4.988639 | 0.015490  | 0.511900  |
| C  | -4.488388 | -1.029509 | -2.214371 |
| C  | -1.558953 | -4.809905 | 1.456110  |
| C  | -1.800039 | -2.742437 | 3.513128  |
| C  | 1.347746  | -2.224822 | -4.193618 |
| C  | 1.638695  | -4.137506 | -1.976605 |
| C  | 4.432168  | -1.949807 | 0.920444  |
| C  | 4.886235  | 0.862855  | 0.119394  |
| H  | -0.716593 | 5.899885  | -1.815189 |
| H  | -2.120601 | 4.861849  | -1.465530 |
| H  | -1.455518 | 6.025119  | 0.649335  |
| H  | 0.224467  | 5.506606  | 0.449760  |

|    |           |           |           |
|----|-----------|-----------|-----------|
| H  | -5.640828 | -2.776874 | 0.157747  |
| H  | -4.329725 | -4.158591 | 1.884836  |
| H  | -4.228156 | -3.591154 | -0.554140 |
| H  | -4.436840 | -2.445511 | 2.314461  |
| H  | 4.635523  | -0.370719 | -2.622187 |
| H  | 5.688037  | -1.514733 | -1.754266 |
| H  | 4.183300  | -3.357690 | -2.101898 |
| H  | 4.127464  | -2.504108 | -3.650389 |
| H  | -5.557834 | -1.268430 | -2.257901 |
| H  | -4.320008 | -0.008784 | -2.567211 |
| H  | -3.921574 | -1.728063 | -2.834492 |
| H  | -6.034063 | -0.206096 | 0.264678  |
| H  | -4.830254 | -0.113820 | 1.586463  |
| H  | -4.750150 | 1.043727  | 0.238321  |
| H  | -2.272123 | -3.529040 | 4.113258  |
| H  | -0.719700 | -2.748616 | 3.684074  |
| H  | -2.188375 | -1.764210 | 3.808743  |
| H  | -2.029048 | -5.450173 | 2.211854  |
| H  | -1.822619 | -5.147855 | 0.451883  |
| H  | -0.471335 | -4.850419 | 1.563095  |
| H  | 1.810062  | -3.004481 | -4.810755 |
| H  | 0.262057  | -2.356421 | -4.186538 |
| H  | 1.588946  | -1.235078 | -4.588584 |
| H  | 2.134468  | -4.786057 | -2.709589 |
| H  | 2.039125  | -4.341623 | -0.978983 |
| H  | 0.564865  | -4.328413 | -1.973778 |
| H  | 5.948876  | 0.647902  | -0.047404 |
| H  | 4.570889  | 1.701712  | -0.506329 |
| H  | 4.733410  | 1.077165  | 1.184498  |
| H  | 5.490559  | -2.180693 | 0.747891  |
| H  | 4.330738  | -1.521131 | 1.927646  |
| H  | 3.829275  | -2.857726 | 0.826591  |
| H  | -0.387685 | 4.840741  | 3.288840  |
| H  | -0.379595 | 3.067961  | 3.528258  |
| H  | 0.918981  | 3.827979  | 2.594730  |
| H  | -2.981272 | 4.825256  | 2.449174  |
| H  | -3.605851 | 3.892813  | 1.045126  |
| H  | -3.180020 | 3.049236  | 2.548876  |
| H  | -0.475759 | 4.281287  | -4.208341 |
| H  | 0.021445  | 2.561391  | -4.141919 |
| H  | -1.656292 | 3.013991  | -3.734654 |
| H  | 1.647988  | 5.078402  | -2.583827 |
| H  | 1.972565  | 4.438186  | -0.940704 |
| H  | 2.304465  | 3.423263  | -2.356600 |
| Cl | -1.690620 | -3.229699 | -1.611314 |
| Cl | 2.347299  | 0.946302  | -2.805712 |
| Cl | -3.021118 | 2.266892  | -1.150668 |
| C  | 2.157098  | 0.232250  | 5.819659  |
| H  | 1.852490  | 1.115786  | 6.392648  |
| H  | 2.020167  | -0.669403 | 6.427368  |
| H  | 3.219521  | 0.320461  | 5.509610  |
| C  | 1.421822  | 0.140350  | 4.565572  |
| N  | 0.917211  | 0.081330  | 3.508697  |

mofe-clHCl...mcn

E(CH<sub>3</sub>CN)= -1328.9201005 a. u.

|    |           |           |          |
|----|-----------|-----------|----------|
| C  | -2.520466 | -2.128201 | 4.011355 |
| C  | -3.569076 | -2.311531 | 2.895630 |
| P  | -3.336194 | -1.085122 | 1.445539 |
| Mo | -0.805285 | -0.354749 | 1.288209 |

|    |           |           |           |
|----|-----------|-----------|-----------|
| P  | -0.763171 | -2.083965 | 3.282498  |
| Mo | 1.548905  | -0.965453 | -0.050766 |
| P  | 2.318226  | -2.828583 | -1.731756 |
| C  | 4.163204  | -3.167186 | -1.422873 |
| C  | 4.974914  | -1.867920 | -1.294864 |
| P  | 4.175131  | -0.504788 | -0.198071 |
| S  | 1.481214  | 0.559941  | -2.042576 |
| Fe | -0.533162 | -0.357264 | -1.444339 |
| Cl | -1.562800 | -0.786769 | -3.476713 |
| Mo | 0.628696  | 1.679745  | -0.035125 |
| P  | 0.219433  | 3.540795  | -1.838597 |
| C  | -0.377928 | 5.160824  | -1.023134 |
| C  | 0.132204  | 5.302116  | 0.425094  |
| P  | -0.258059 | 3.735728  | 1.440972  |
| S  | 1.413428  | 0.456243  | 1.949823  |
| S  | -0.647040 | -2.263632 | -0.168771 |
| S  | -1.758439 | 1.239211  | -0.349247 |
| C  | -4.110183 | -2.002153 | -0.000971 |
| C  | -4.608075 | 0.265079  | 1.767103  |
| C  | -0.473666 | -3.914994 | 2.947070  |
| C  | 0.357819  | -1.717477 | 4.741991  |
| C  | -2.094593 | 4.021211  | 1.772015  |
| C  | 0.554975  | 4.067265  | 3.101375  |
| C  | 1.716710  | 4.074051  | -2.846474 |
| C  | -1.075141 | 3.228870  | -3.170291 |
| C  | 5.139105  | -0.561174 | 1.418231  |
| C  | 4.939145  | 0.993662  | -1.050808 |
| C  | 2.208240  | -2.509953 | -3.587280 |
| C  | 1.566678  | -4.545019 | -1.568644 |
| H  | -2.578606 | -2.954538 | 4.732276  |
| H  | -2.673739 | -1.185884 | 4.543869  |
| H  | -4.582810 | -2.181083 | 3.294550  |
| H  | -3.511138 | -3.321598 | 2.470003  |
| H  | -0.344449 | 6.160511  | 0.916825  |
| H  | -0.042195 | 6.005662  | -1.637533 |
| H  | 1.216103  | 5.443956  | 0.448462  |
| H  | -1.474947 | 5.149997  | -1.050259 |
| H  | 4.206857  | -3.747544 | -0.496637 |
| H  | 4.553991  | -3.785582 | -2.242326 |
| H  | 5.111945  | -1.406383 | -2.281636 |
| H  | 5.974308  | -2.078297 | -0.892727 |
| H  | 0.278874  | 5.062109  | 3.471520  |
| H  | 0.218915  | 3.302298  | 3.805674  |
| H  | 1.638522  | 3.999715  | 2.977699  |
| H  | -2.232764 | 5.017378  | 2.209864  |
| H  | -2.659326 | 3.947021  | 0.838319  |
| H  | -2.456256 | 3.256685  | 2.460244  |
| H  | -1.095600 | 4.061444  | -3.883537 |
| H  | -0.839407 | 2.297089  | -3.692317 |
| H  | -2.057996 | 3.115326  | -2.704426 |
| H  | 1.459548  | 4.931790  | -3.479306 |
| H  | 2.531538  | 4.329509  | -2.165798 |
| H  | 2.032859  | 3.236287  | -3.474707 |
| H  | 6.215877  | -0.490248 | 1.223544  |
| H  | 4.820969  | 0.284343  | 2.035889  |
| H  | 4.902196  | -1.488921 | 1.942520  |
| H  | 6.010889  | 0.812305  | -1.199900 |
| H  | 4.452567  | 1.150334  | -2.017763 |
| H  | 4.785120  | 1.884786  | -0.442085 |
| H  | 2.149020  | -5.267824 | -2.152756 |
| H  | 1.570161  | -4.826319 | -0.512999 |

|    |           |           |           |
|----|-----------|-----------|-----------|
| H  | 0.535386  | -4.528425 | -1.931891 |
| H  | 2.558216  | -3.385431 | -4.146834 |
| H  | 1.168296  | -2.294261 | -3.851999 |
| H  | 2.810354  | -1.635574 | -3.850670 |
| H  | -5.138954 | -2.291696 | 0.243166  |
| H  | -4.123416 | -1.341306 | -0.869807 |
| H  | -3.524588 | -2.889409 | -0.249975 |
| H  | -5.575356 | -0.194816 | 2.004170  |
| H  | -4.272114 | 0.890306  | 2.596121  |
| H  | -4.716495 | 0.868996  | 0.861415  |
| H  | 0.137688  | -2.392968 | 5.577250  |
| H  | 1.393854  | -1.853731 | 4.419140  |
| H  | 0.206939  | -0.679201 | 5.046933  |
| H  | -0.613182 | -4.482808 | 3.875050  |
| H  | -1.176359 | -4.267281 | 2.186723  |
| H  | 0.541937  | -4.049144 | 2.571023  |
| Cl | 2.706481  | 3.133216  | 0.352189  |
| Cl | 2.492168  | -2.807465 | 1.522874  |
| Cl | -1.590446 | 1.026159  | 3.337877  |
| Cl | -3.720465 | -3.434658 | -3.522574 |
| H  | -2.816970 | -2.412281 | -3.456339 |
| C  | -5.121986 | 0.165768  | -4.081391 |
| H  | -5.699812 | 0.758044  | -4.799602 |
| H  | -4.064868 | 0.165172  | -4.370234 |
| H  | -5.476567 | -0.870905 | -4.102025 |
| C  | -5.260585 | 0.720202  | -2.729773 |
| N  | -5.348416 | 1.146058  | -1.632763 |

mofe-mcn...clHcl

E(CH<sub>3</sub>CN)= -1328.9310418 a. u

|    |             |             |             |
|----|-------------|-------------|-------------|
| C  | -1.37483600 | -4.18279000 | -2.77502600 |
| C  | -2.12270800 | -4.44834600 | -1.45229700 |
| P  | -1.21611300 | -3.67335200 | 0.03450500  |
| Mo | 0.01532700  | -1.46961700 | -0.72432100 |
| P  | -1.04708700 | -2.32006000 | -2.99304600 |
| Mo | -0.36855800 | 1.27527900  | -0.88907400 |
| P  | -2.41541200 | 2.93331300  | -0.65150600 |
| C  | -2.15532900 | 4.31438700  | -1.93162500 |
| C  | -0.73193100 | 4.89014000  | -1.87900800 |
| P  | 0.66776200  | 3.57923700  | -1.75810600 |
| S  | 0.38668800  | 2.09887600  | 1.37257400  |
| Fe | -0.74478100 | 0.12296800  | 1.39082300  |
| Cl | -5.08535400 | 1.54847300  | 2.46146600  |
| Mo | 1.84678200  | 0.31978100  | 0.47716300  |
| P  | 2.97893900  | 0.76941600  | 2.80275500  |
| C  | 4.54892000  | -0.29668100 | 3.00678500  |
| C  | 5.21744500  | -0.59881300 | 1.64998400  |
| P  | 3.95954700  | -1.32911400 | 0.41617400  |
| S  | 1.49422300  | 0.05843000  | -1.93605300 |
| S  | -2.13268700 | -0.48387700 | -0.30838800 |
| S  | 0.79108800  | -1.57552700 | 1.63648600  |
| C  | -2.51965700 | -3.59262600 | 1.38311300  |
| C  | -0.11179000 | -5.07340600 | 0.64258000  |
| C  | -2.75549200 | -1.73064400 | -3.52676900 |
| C  | -0.01996100 | -2.18701300 | -4.55763700 |
| C  | 3.87933000  | -3.10222200 | 1.05811600  |
| C  | 4.93281500  | -1.47238400 | -1.18350100 |
| C  | 3.58504600  | 2.52184400  | 3.12565800  |
| C  | 1.99756600  | 0.39665700  | 4.36655000  |

|    |             |             |             |
|----|-------------|-------------|-------------|
| C  | 1.45253500  | 3.54545900  | -3.46802600 |
| C  | 1.90587900  | 4.60357600  | -0.77019100 |
| C  | -2.69331100 | 3.86933500  | 0.95929700  |
| C  | -4.12716500 | 2.28846700  | -1.07722400 |
| H  | -1.96878800 | -4.53291500 | -3.62932100 |
| H  | -0.40601900 | -4.69059200 | -2.79263900 |
| H  | -2.22731000 | -5.52603200 | -1.27421700 |
| H  | -3.13176400 | -4.01927000 | -1.47690200 |
| H  | 6.03424300  | -1.32104500 | 1.77951300  |
| H  | 5.24450500  | 0.22632500  | 3.67513200  |
| H  | 5.62510600  | 0.31080800  | 1.20030500  |
| H  | 4.24725200  | -1.22583400 | 3.50727100  |
| H  | -2.36342900 | 3.86868500  | -2.90770900 |
| H  | -2.89474700 | 5.10393900  | -1.74165200 |
| H  | -0.61384600 | 5.52737300  | -0.99300900 |
| H  | -0.53364700 | 5.51450000  | -2.75967200 |
| H  | 5.90471000  | -1.94538900 | -0.99831000 |
| H  | 4.35227800  | -2.07600000 | -1.88542300 |
| H  | 5.07457900  | -0.46981500 | -1.59379000 |
| H  | 4.88866700  | -3.53175700 | 1.05979800  |
| H  | 3.47469300  | -3.11128000 | 2.07440600  |
| H  | 3.22669200  | -3.68761100 | 0.40959500  |
| H  | 2.60037600  | 0.60950000  | 5.25712500  |
| H  | 1.09732400  | 1.01788000  | 4.37538600  |
| H  | 1.69120400  | -0.65278000 | 4.36750200  |
| H  | 4.08214800  | 2.57452800  | 4.10141700  |
| H  | 4.27218700  | 2.81590600  | 2.32981000  |
| H  | 2.72594600  | 3.19844000  | 3.11273800  |
| H  | 1.72223200  | 4.56003400  | -3.78428200 |
| H  | 2.35170500  | 2.92396900  | -3.42235300 |
| H  | 0.74807000  | 3.09881100  | -4.17280400 |
| H  | 1.99593400  | 5.59503900  | -1.23105100 |
| H  | 1.55058700  | 4.70892300  | 0.25910800  |
| H  | 2.87516200  | 4.10476200  | -0.75526700 |
| H  | -4.80471800 | 3.13306800  | -1.25126800 |
| H  | -4.05951000 | 1.67203600  | -1.97646400 |
| H  | -4.50567600 | 1.70219000  | -0.23508200 |
| H  | -3.41435900 | 4.67904500  | 0.79516500  |
| H  | -3.11502900 | 3.17822700  | 1.69624200  |
| H  | -1.74919800 | 4.27735700  | 1.33039700  |
| H  | -2.99805700 | -4.57215800 | 1.50030100  |
| H  | -2.03561200 | -3.31647800 | 2.32487700  |
| H  | -3.28489200 | -2.84307500 | 1.16780600  |
| H  | -0.73211600 | -5.92339800 | 0.95066800  |
| H  | 0.57715300  | -5.36909100 | -0.15029200 |
| H  | 0.47194100  | -4.71668900 | 1.49609400  |
| H  | -0.48540100 | -2.75711600 | -5.37043300 |
| H  | 0.04261400  | -1.13136700 | -4.83640800 |
| H  | 0.98302900  | -2.56965200 | -4.35480500 |
| H  | -3.07138200 | -2.29546400 | -4.41233200 |
| H  | -3.47331900 | -1.88138600 | -2.71558900 |
| H  | -2.70950600 | -0.66509800 | -3.75651700 |
| Cl | 3.80159600  | 1.80315900  | -0.24143000 |
| Cl | -1.30501300 | 1.38257400  | -3.29764100 |
| Cl | 1.69550500  | -3.26072700 | -1.56877700 |
| Cl | -5.47626600 | -1.64552200 | 2.29915700  |
| H  | -5.31739400 | -0.11563200 | 2.32871000  |
| C  | -3.48054600 | -0.28449500 | 4.93885300  |
| H  | -2.99769600 | -0.40919800 | 5.91464700  |
| H  | -4.09483500 | 0.62348700  | 4.92591400  |
| H  | -4.14565800 | -1.13010900 | 4.72624700  |

|   |             |             |            |
|---|-------------|-------------|------------|
| C | -2.48927800 | -0.18087800 | 3.87190900 |
| N | -1.71112300 | -0.10215200 | 2.99854100 |

mofe-cl-sph (los dos coordinados)

$E(\text{CH}_3\text{CN}) = -1422.4735185 \text{ a. u}$

|    |           |           |           |
|----|-----------|-----------|-----------|
| C  | 4.766169  | 0.206422  | -3.183945 |
| C  | 4.244346  | -1.190292 | -3.564012 |
| P  | 2.386672  | -1.368010 | -3.195860 |
| Mo | 1.911909  | -0.422749 | -0.817953 |
| P  | 4.068184  | 0.912306  | -1.526835 |
| Mo | 0.295452  | 1.573453  | 0.573060  |
| P  | -1.038329 | 3.781720  | 0.021869  |
| C  | -0.509834 | 5.136848  | 1.265943  |
| C  | -0.225900 | 4.639429  | 2.704608  |
| P  | -0.079219 | 2.732566  | 2.905510  |
| S  | -1.933816 | 0.569798  | 0.848820  |
| Fe | -1.496093 | 0.037802  | -1.318500 |
| Mo | -0.069749 | -1.031419 | 1.248664  |
| P  | -2.002645 | -2.760356 | 1.748740  |
| C  | -1.515686 | -3.779738 | 3.289635  |
| C  | -0.013106 | -4.152430 | 3.373054  |
| P  | 1.150703  | -3.224714 | 2.149611  |
| S  | 2.055284  | 0.168270  | 1.561391  |
| S  | 0.558574  | 1.289404  | -1.813741 |
| S  | 0.013542  | -1.945114 | -0.950046 |
| C  | 1.534722  | -0.579926 | -4.683310 |
| C  | 2.103050  | -3.203656 | -3.502937 |
| C  | 4.067173  | 2.734006  | -2.029630 |
| C  | 5.538981  | 0.840735  | -0.348098 |
| C  | 1.611518  | -4.636040 | 0.978652  |
| C  | 2.716414  | -3.020729 | 3.172779  |
| C  | -3.705660 | -2.123386 | 2.231115  |
| C  | -2.428607 | -4.125602 | 0.516234  |
| C  | 1.271208  | 2.562225  | 4.204049  |
| C  | -1.648076 | 2.380355  | 3.898795  |
| C  | -2.919927 | 3.865063  | 0.142800  |
| C  | -0.684588 | 4.636873  | -1.615572 |
| H  | 4.486143  | 0.937415  | -3.954140 |
| H  | 5.862314  | 0.204493  | -3.117799 |
| H  | 4.730386  | -1.960831 | -2.957768 |
| H  | 4.431580  | -1.402084 | -4.626345 |
| H  | 0.133168  | -5.225436 | 3.193439  |
| H  | -1.783783 | -3.152535 | 4.143310  |
| H  | 0.361514  | -3.923962 | 4.376152  |
| H  | -2.142863 | -4.681552 | 3.306808  |
| H  | 0.402879  | 5.563795  | 0.843646  |
| H  | -1.290223 | 5.910096  | 1.266379  |
| H  | -1.012925 | 4.967246  | 3.396172  |
| H  | 0.724599  | 5.056219  | 3.053401  |
| H  | 3.016071  | -3.980033 | 3.614339  |
| H  | 3.504997  | -2.648489 | 2.513456  |
| H  | 2.518916  | -2.286423 | 3.958390  |
| H  | 2.020893  | -5.479406 | 1.550516  |
| H  | 0.723057  | -4.961005 | 0.428245  |
| H  | 2.356784  | -4.263784 | 0.272558  |
| H  | -3.166365 | -4.807799 | 0.958352  |
| H  | -2.833389 | -3.659993 | -0.387262 |
| H  | -1.524477 | -4.680816 | 0.248187  |

|    |           |           |           |
|----|-----------|-----------|-----------|
| H  | -4.324844 | -2.942160 | 2.619377  |
| H  | -3.587613 | -1.346498 | 2.991150  |
| H  | -4.178715 | -1.690218 | 1.345611  |
| H  | 1.063835  | 3.211535  | 5.064727  |
| H  | 1.303532  | 1.516640  | 4.521528  |
| H  | 2.224316  | 2.834289  | 3.742874  |
| H  | -1.647518 | 2.981983  | 4.817275  |
| H  | -2.524296 | 2.629403  | 3.292247  |
| H  | -1.676731 | 1.317184  | 4.144590  |
| H  | -1.138812 | 5.636259  | -1.630430 |
| H  | 0.399666  | 4.713969  | -1.735865 |
| H  | -1.103487 | 4.017481  | -2.412965 |
| H  | -3.259675 | 4.889035  | -0.061028 |
| H  | -3.338230 | 3.177457  | -0.596779 |
| H  | -3.240349 | 3.561215  | 1.144482  |
| H  | 1.867754  | -1.046620 | -5.618737 |
| H  | 0.452863  | -0.703010 | -4.570916 |
| H  | 1.743516  | 0.493561  | -4.703582 |
| H  | 2.462241  | -3.488656 | -4.499847 |
| H  | 2.639779  | -3.765379 | -2.733775 |
| H  | 1.033665  | -3.416201 | -3.417453 |
| H  | 6.432409  | 1.284882  | -0.805398 |
| H  | 5.270370  | 1.396406  | 0.555888  |
| H  | 5.716485  | -0.204443 | -0.082488 |
| H  | 5.030267  | 2.989949  | -2.491310 |
| H  | 3.254123  | 2.903870  | -2.743155 |
| H  | 3.879803  | 3.350134  | -1.149111 |
| Cl | -0.305300 | -0.827802 | 3.863922  |
| Cl | 2.198623  | 3.436013  | 0.695664  |
| Cl | 3.775786  | -2.256995 | -0.357796 |
| S  | -3.075082 | -1.562490 | -1.916270 |
| H  | -4.641278 | 0.513107  | -0.441077 |
| C  | -5.298929 | 0.067650  | -1.180851 |
| C  | -4.778418 | -0.905514 | -2.066211 |
| C  | -6.642034 | 0.473568  | -1.272804 |
| C  | -5.636379 | -1.448044 | -3.052540 |
| C  | -7.495680 | -0.077725 | -2.251216 |
| H  | -7.019384 | 1.228983  | -0.584483 |
| C  | -6.981364 | -1.040285 | -3.142626 |
| H  | -5.240550 | -2.183619 | -3.749233 |
| H  | -8.533949 | 0.242345  | -2.322044 |
| H  | -7.621493 | -1.469845 | -3.912584 |
| Cl | -2.580352 | 1.699941  | -2.582161 |

mofe-sph

$E(\text{CH}_3\text{CN}) = -1407.3697422 \text{ a. u}$

|    |             |             |             |
|----|-------------|-------------|-------------|
| C  | 5.75908900  | 1.31234500  | -2.93802600 |
| C  | 4.35562600  | 1.40885500  | -3.00447100 |
| C  | 3.56772400  | 0.25030200  | -3.17375000 |
| C  | 4.20570900  | -1.00491000 | -3.28547400 |
| C  | 5.60934800  | -1.09893500 | -3.22526200 |
| C  | 6.39345100  | 0.05879000  | -3.04892700 |
| S  | 1.73509500  | 0.36275400  | -3.37469600 |
| Fe | 0.73866600  | 0.11653500  | -1.40382800 |
| S  | -1.42130400 | 0.40653500  | -2.10090000 |
| Mo | -0.93714700 | 1.50414100  | 0.06065500  |
| S  | -1.62220500 | -0.05556100 | 1.82582800  |
| Mo | 0.76588100  | -0.29833700 | 1.33478900  |
| S  | 1.07161300  | -1.93211500 | -0.49117500 |



|    |             |             |             |
|----|-------------|-------------|-------------|
| Mo | -1.29933800 | -1.25970800 | -0.29485700 |
| P  | -1.63185200 | -3.61686700 | 0.90642000  |
| C  | -2.64488800 | -3.68932900 | 2.48657000  |
| P  | -1.67166200 | -2.87795100 | -2.33152500 |
| C  | -3.14979900 | -2.51716000 | -3.44141800 |
| C  | -1.99611500 | -4.66057400 | -1.72045700 |
| C  | -2.63076000 | -4.68949500 | -0.31528200 |
| C  | -0.29226700 | -3.11906700 | -3.59175400 |
| C  | -0.18994700 | -4.78854300 | 1.24619000  |
| P  | 3.32627200  | -0.80157500 | 1.71141300  |
| C  | 3.81893200  | -2.61326600 | 1.85968800  |
| P  | 1.31544800  | 1.05514300  | 3.54783400  |
| C  | 2.00027700  | 2.81005600  | 3.43801500  |
| S  | 1.59316700  | 1.60817300  | 0.11082500  |
| C  | 3.93036800  | -0.03899800 | 3.36203600  |
| C  | 2.79009500  | 0.17909900  | 4.37557100  |
| C  | 4.60605000  | -0.15131200 | 0.49568900  |
| C  | 0.01735200  | 1.14968800  | 4.90006400  |
| P  | -0.67201600 | 3.72082700  | -1.31618200 |
| C  | -0.66472700 | 3.66530600  | -3.20037800 |
| P  | -3.45880600 | 2.35387700  | -0.12555900 |
| C  | -4.40947000 | 2.53764000  | 1.48914300  |
| C  | -2.13542300 | 4.85934200  | -0.89400300 |
| C  | -3.48089500 | 4.11227900  | -0.91132400 |
| C  | 0.80467100  | 4.82289400  | -0.93618800 |
| C  | -4.74671000 | 1.54742800  | -1.24330200 |
| Cl | -3.86970300 | -1.57197700 | -0.18646300 |
| Cl | 0.66111800  | -2.10613200 | 3.20437900  |
| Cl | -1.04048100 | 3.34820100  | 1.90998100  |
| H  | -2.66212100 | -5.71798900 | 0.06875800  |
| H  | -3.64864100 | -4.29090600 | -0.33573500 |
| H  | -2.64122200 | -5.16742700 | -2.44927900 |
| H  | -1.02918800 | -5.18043600 | -1.71849600 |
| H  | -3.82201500 | 3.96697900  | -1.94445900 |
| H  | -1.92398500 | 5.25166200  | 0.10458100  |
| H  | -4.24884500 | 4.70122700  | -0.39382400 |
| H  | -2.15199500 | 5.69688500  | -1.60469600 |
| H  | 4.70210900  | -0.69630100 | 3.78214600  |
| H  | 4.41274800  | 0.91451800  | 3.11087900  |
| H  | 3.13737800  | 0.79606500  | 5.21522300  |
| H  | 2.42405700  | -0.77357200 | 4.76684400  |
| H  | -5.37825600 | 3.02049700  | 1.31294200  |
| H  | -4.56767700 | 1.53876400  | 1.90672700  |
| H  | -3.80854900 | 3.12251000  | 2.18864900  |
| H  | -5.63189900 | 2.19363600  | -1.29822400 |
| H  | -4.32446500 | 1.41181100  | -2.24339900 |
| H  | -5.01481300 | 0.56603400  | -0.84914900 |
| H  | -0.52484000 | 4.67121400  | -3.61374400 |
| H  | 0.14654400  | 3.00971800  | -3.53113400 |
| H  | -1.60754300 | 3.24465600  | -3.56186400 |
| H  | 0.67663300  | 5.80779200  | -1.40103600 |
| H  | 0.88571100  | 4.92599900  | 0.14868200  |
| H  | 1.71366400  | 4.34933500  | -1.31731000 |
| H  | 0.45044000  | 1.55143000  | 5.82392900  |
| H  | -0.78986800 | 1.79989200  | 4.55257000  |
| H  | -0.37601500 | 0.14492700  | 5.07523000  |
| H  | 2.32853500  | 3.14033100  | 4.43093700  |
| H  | 2.84397600  | 2.82523000  | 2.74169100  |
| H  | 1.22141000  | 3.47129100  | 3.05544500  |
| H  | 4.89024500  | -2.69633900 | 2.07731300  |
| H  | 3.22979900  | -3.07714000 | 2.65326400  |

|   |             |             |             |
|---|-------------|-------------|-------------|
| H | 3.59561400  | -3.11576600 | 0.91422900  |
| H | 5.61699200  | -0.35848100 | 0.86643800  |
| H | 4.47099400  | -0.63348400 | -0.47537100 |
| H | 4.47082700  | 0.92465600  | 0.35901400  |
| H | -0.60722200 | -3.82584100 | -4.36871000 |
| H | -0.04371500 | -2.15525200 | -4.04383600 |
| H | 0.60254100  | -3.49559900 | -3.08788700 |
| H | -3.25300700 | -3.30343800 | -4.19874200 |
| H | -4.04908500 | -2.45508000 | -2.82526900 |
| H | -2.99314100 | -1.55180200 | -3.93158900 |
| H | -2.90523800 | -4.72623600 | 2.73099300  |
| H | -2.05131300 | -3.25331800 | 3.29411200  |
| H | -3.55159600 | -3.09727800 | 2.33920500  |
| H | -0.57756900 | -5.74707400 | 1.61336400  |
| H | 0.37965800  | -4.95124600 | 0.32599400  |
| H | 0.46390200  | -4.33852600 | 1.99425800  |
| H | 3.60372100  | -1.89855900 | -3.42792000 |
| H | 6.08676600  | -2.07189600 | -3.32258500 |
| H | 3.87300600  | 2.38029100  | -2.93387800 |
| H | 7.47786400  | -0.01314000 | -3.00692100 |
| H | 6.35408500  | 2.21428700  | -2.80960400 |
